# Supplementary material for: Aryl tert-butyl sulfoxide-promoted highly enantioselective addition of allyltrichlorosilane to aldehydes
Source: Royal Society of Chemistry journal article supplement (doi:10.1039/b909850j), 2009-01-01
Supplement: b909850j.pdf [file b909850j.pdf]

# **Aryl *tert*-butyl sulfoxide-promoted highly enantioselective addition of allyltrichlorosilane to aldehydes**

**Peng Wang,<sup>a,b</sup> Junmin Chen,<sup>a,b,c</sup> Linfeng Cun,<sup>a</sup> Jingen Deng,<sup>a,b</sup> Jin Zhu,<sup>a,b</sup> and Jian Liao<sup>a,b,c</sup>**

<sup>a</sup>National Engineering Research Center of Chiral Drugs and Key Laboratory of Asymmetric Synthesis and Chirotechnology of Sichuan Province, Chengdu Institute of Organic Chemistry, Chinese Academy of Sciences, Chengdu 610041, China. Fax: +8628 8522 3978; Tel: +8628 8522 9250; E-mail: jliao10@cioc.ac.cn

<sup>b</sup>Graduate School of Chinese Academy of Science, Beijing 100049, China

<sup>c</sup>College of Chemistry and Chemical Engineering, Jiangxi Normal University, Nanchang 330022, China

## **Supplementary Information**

### **Table of Contents**

1. <sup>1</sup>H-NMR, <sup>13</sup>C-NMR and high-resolution mass spectra
2. HPLC and GC chromatograms

1. <sup>1</sup>H-NMR, <sup>13</sup>C-NMR and high-resolution mass spectra

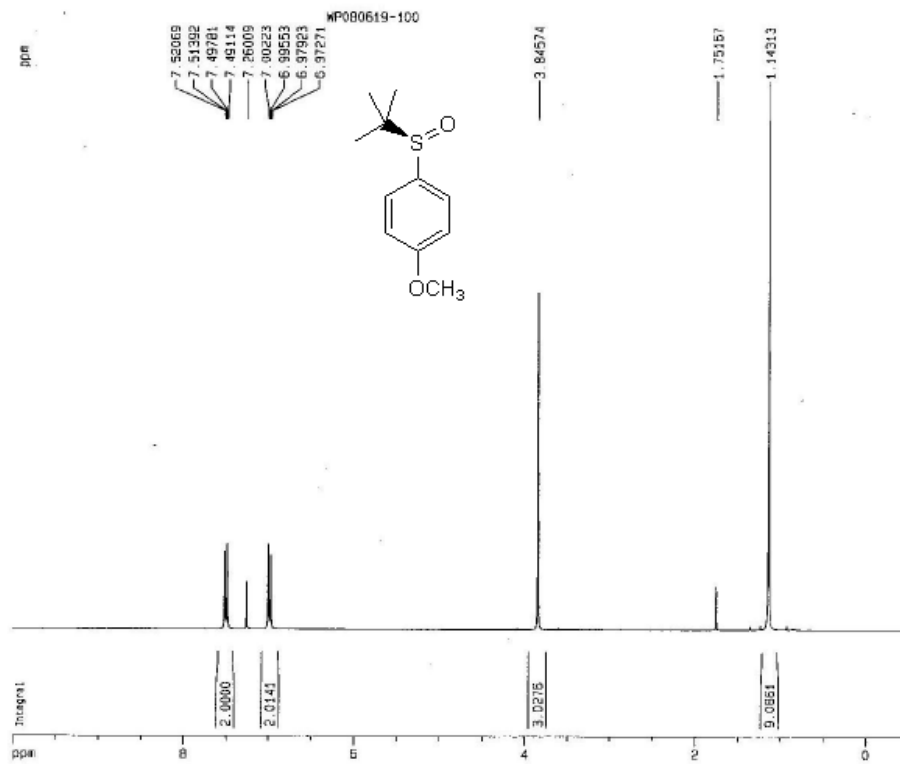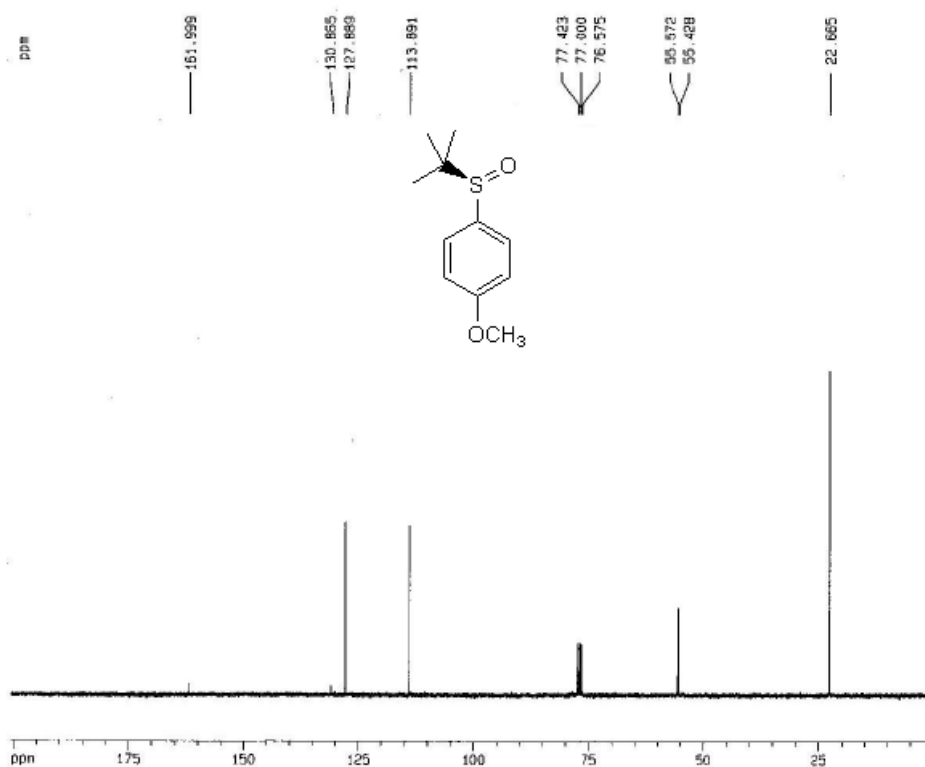

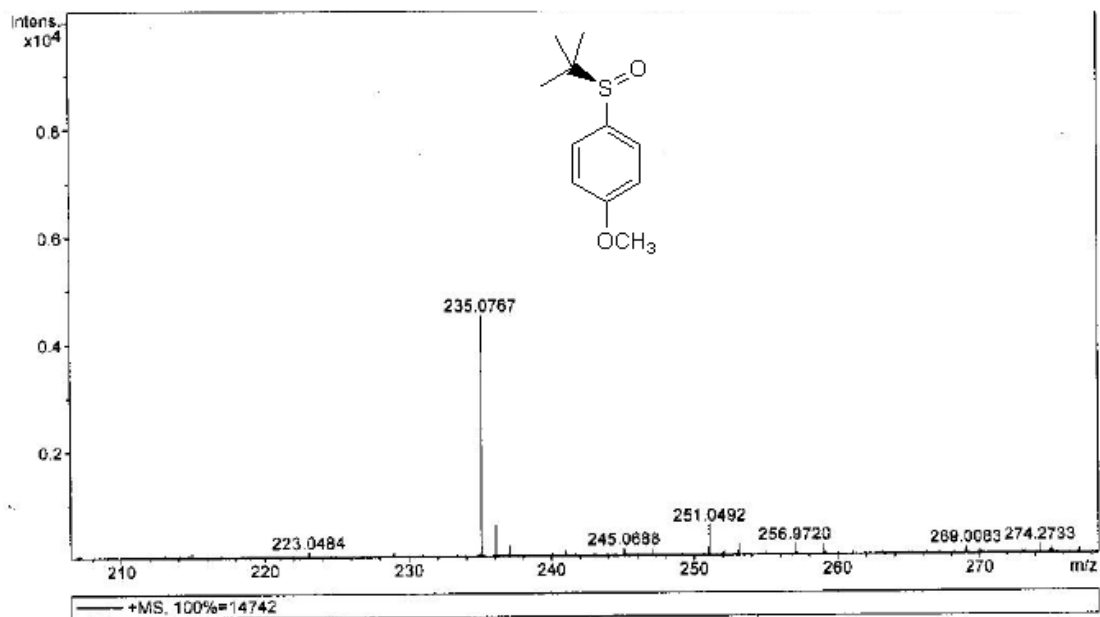

| Sum Formula                                                                   | Sigma | m/z      | Err [ppm] | Mean Err [ppm] | rdB  | N Rule | e <sup>-</sup> |
|-------------------------------------------------------------------------------|-------|----------|-----------|----------------|------|--------|----------------|
| C <sub>11</sub> H <sub>16</sub> Na <sub>1</sub> O <sub>2</sub> S <sub>1</sub> | 0.01  | 235.0763 | -1.62     | -1.47          | 3.50 | ok     | even           |

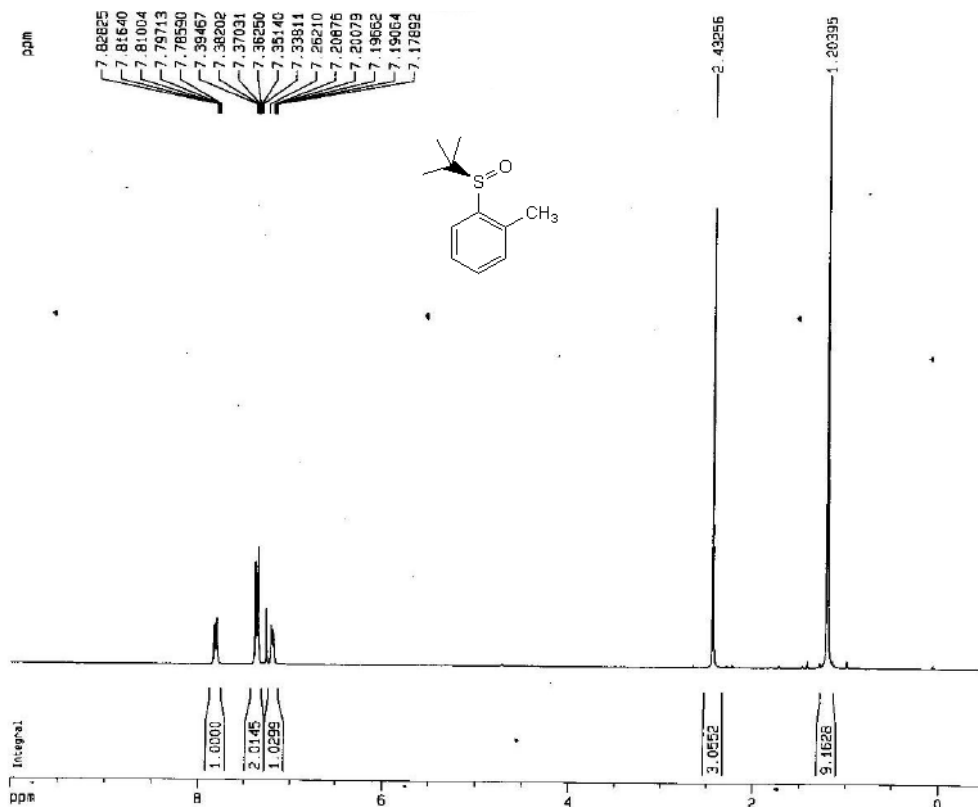

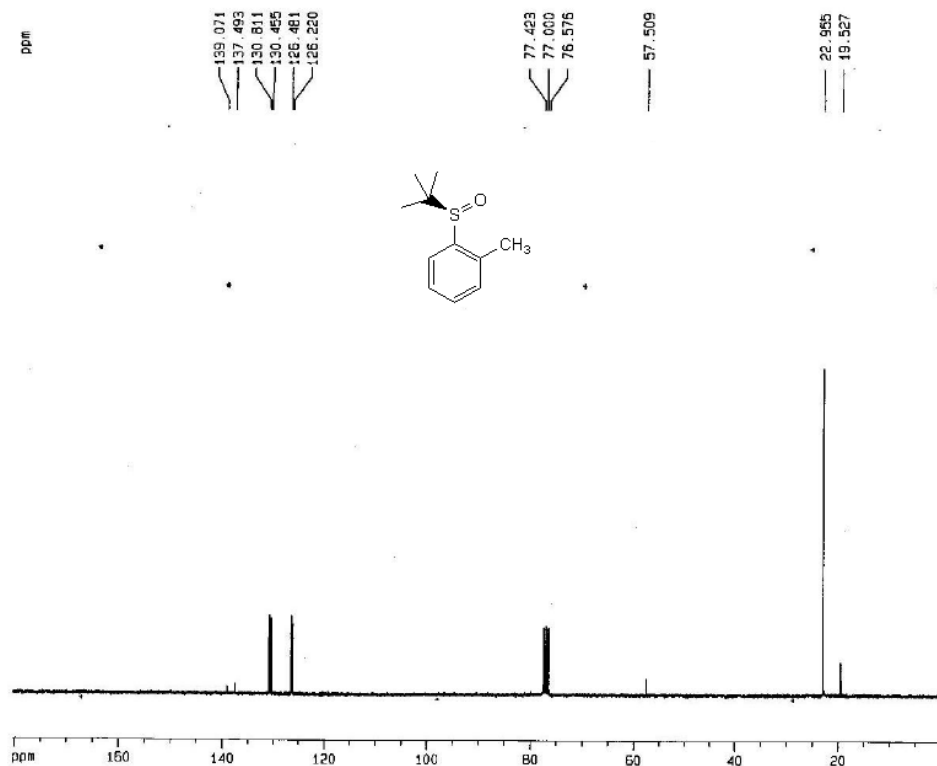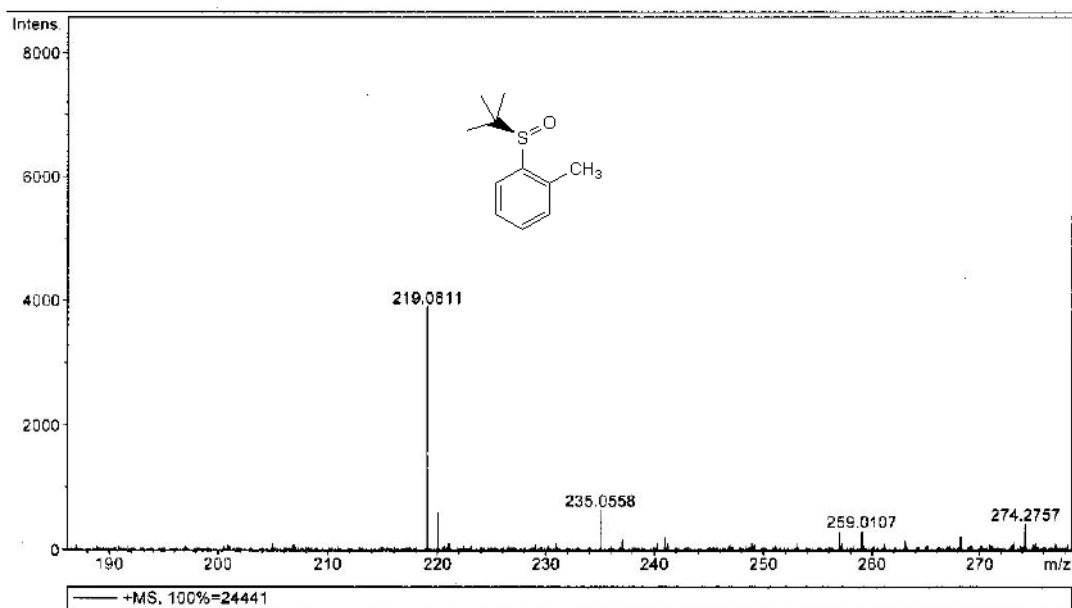

| Sum Formula            | Sigma | m/z      | Err [ppm] | Mean Err [ppm] | rdb  | N Rule | e <sup>-</sup> |
|------------------------|-------|----------|-----------|----------------|------|--------|----------------|
| C 11 H 16 Na 1 O 1 S 1 | 0.03  | 219.0814 | 1.20      | 1.86           | 3.60 | ok     | even           |

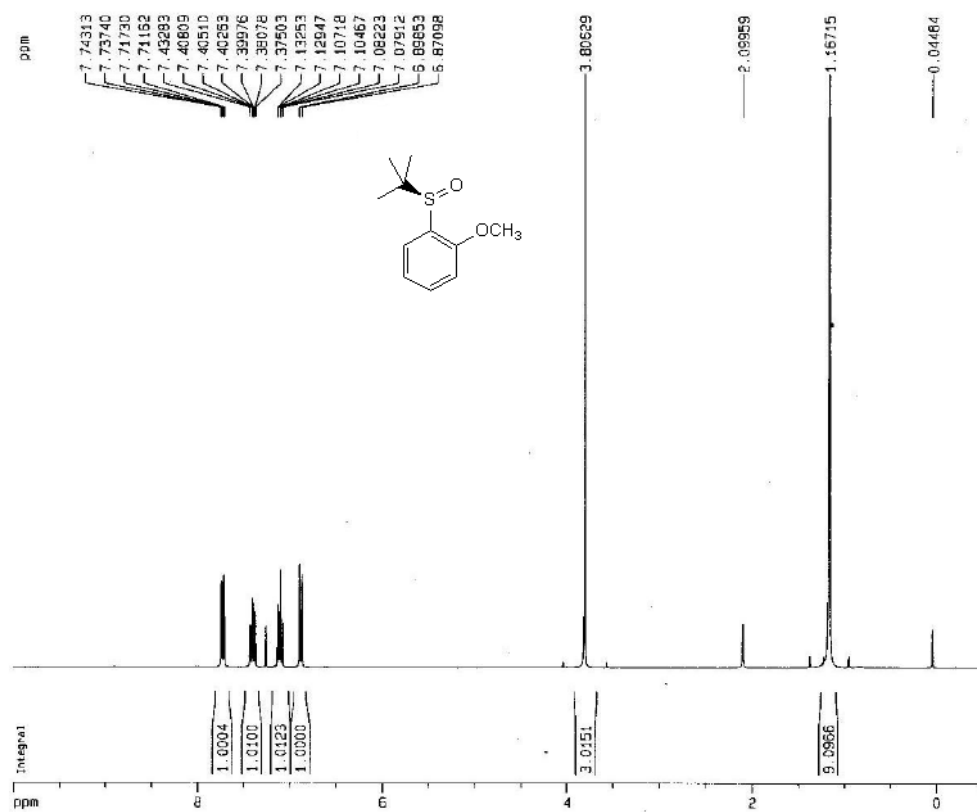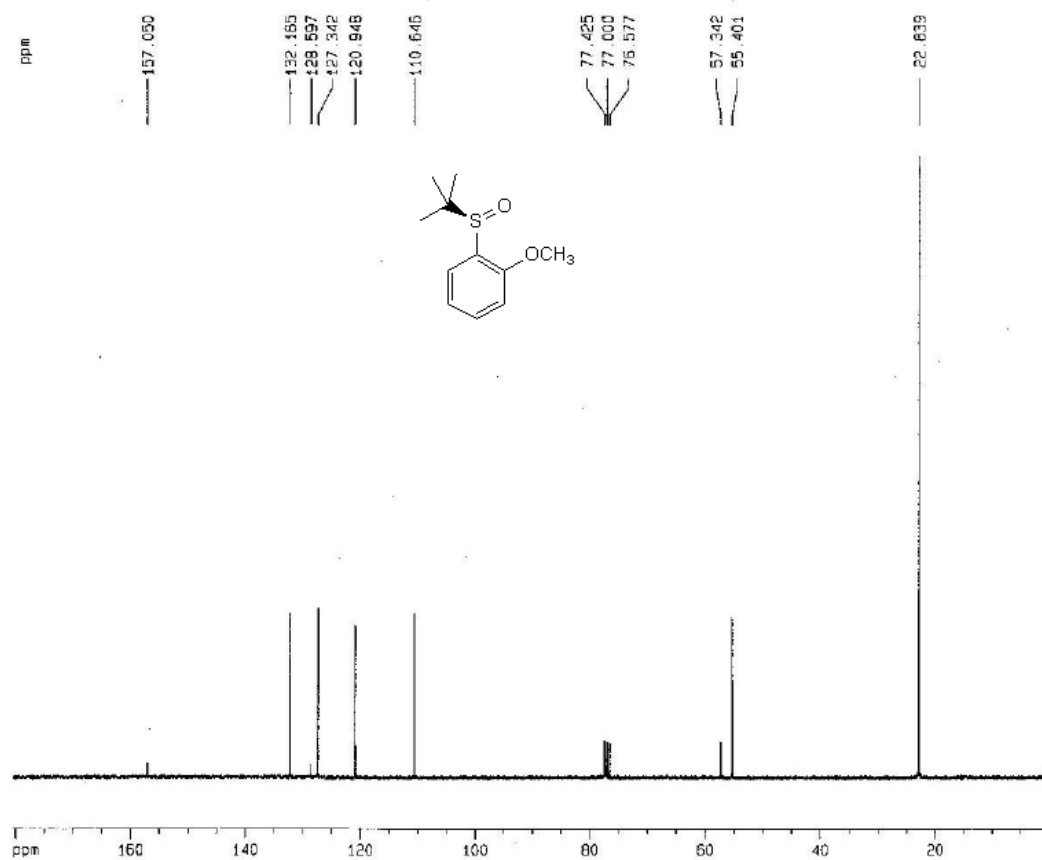

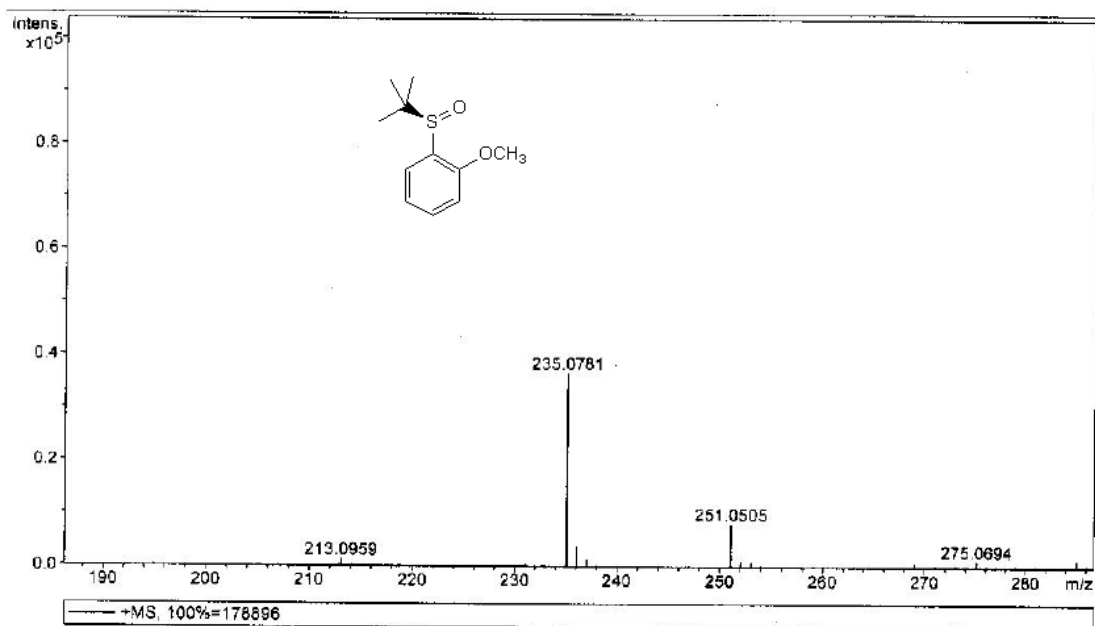

| Sum  | Formula | Sigma | m/z | Err [ppm] | Mean Err [ppm] | rb       | N Rule | e <sup>-</sup> |      |    |      |
|------|---------|-------|-----|-----------|----------------|----------|--------|----------------|------|----|------|
| C 11 | H 16    | Na 1  | O 2 | S 1       | 0.02           | 235.0763 | -7.66  | -6.78          | 3.50 | ok | even |

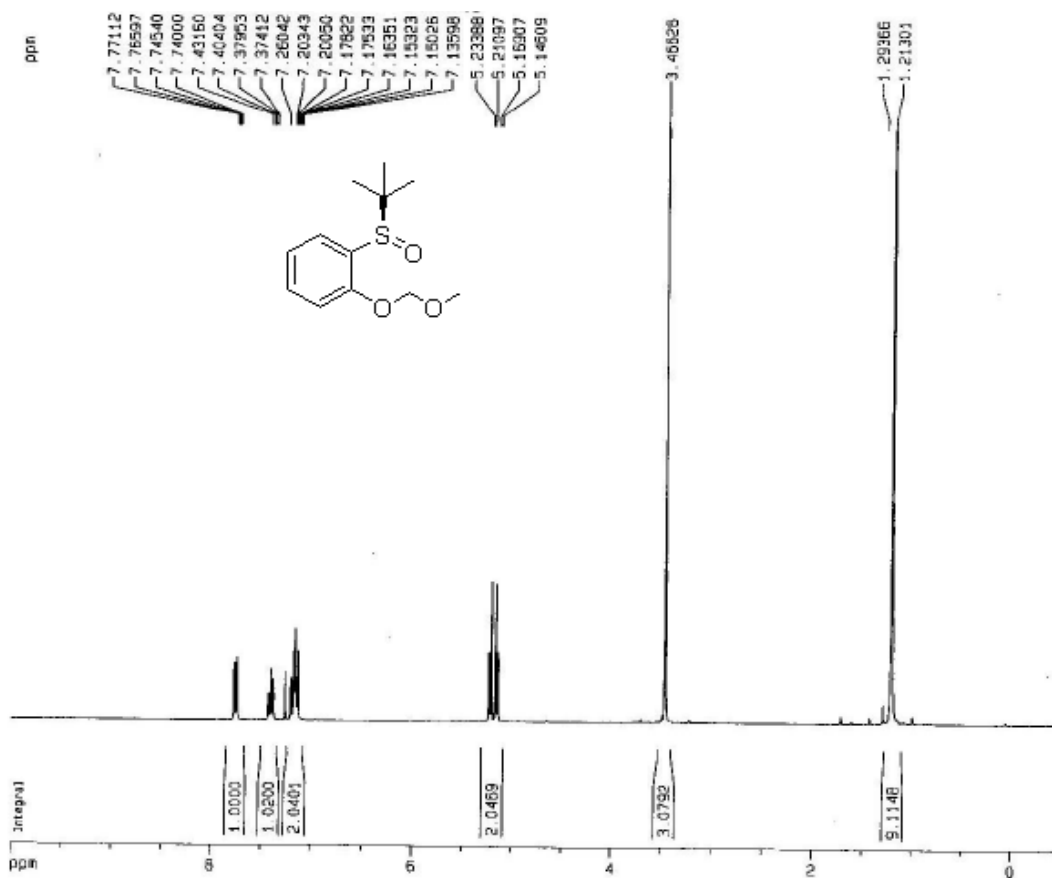

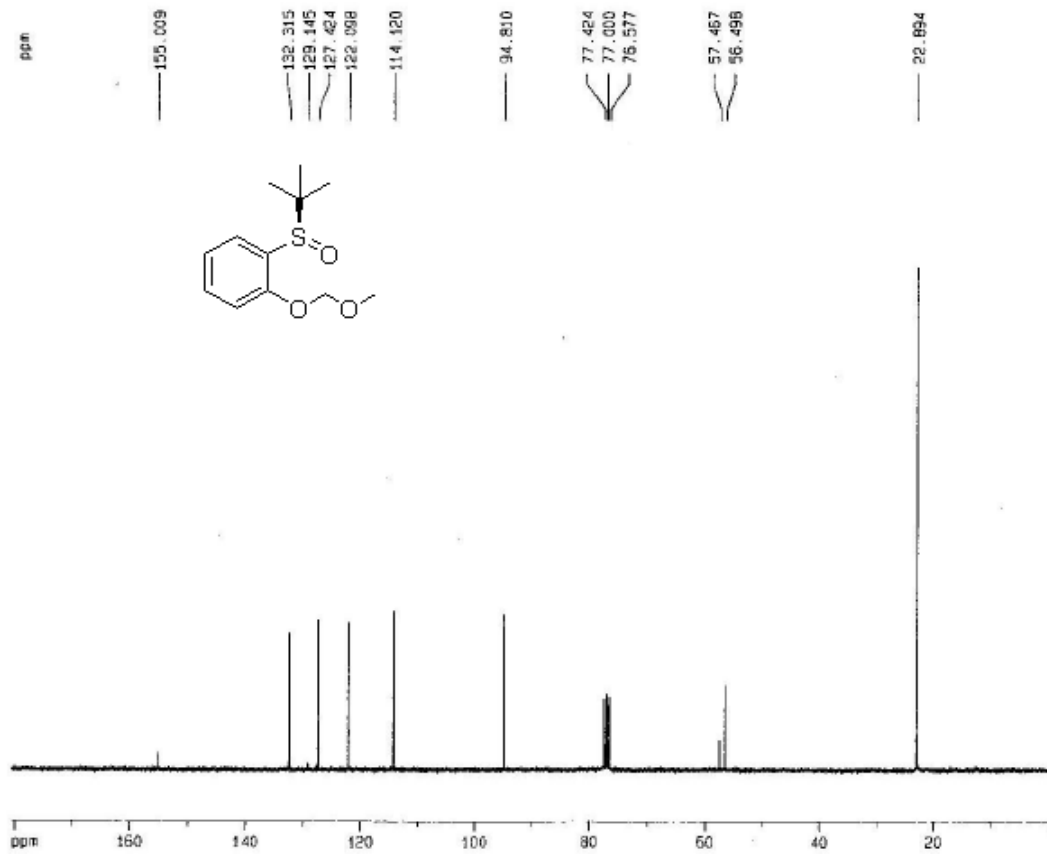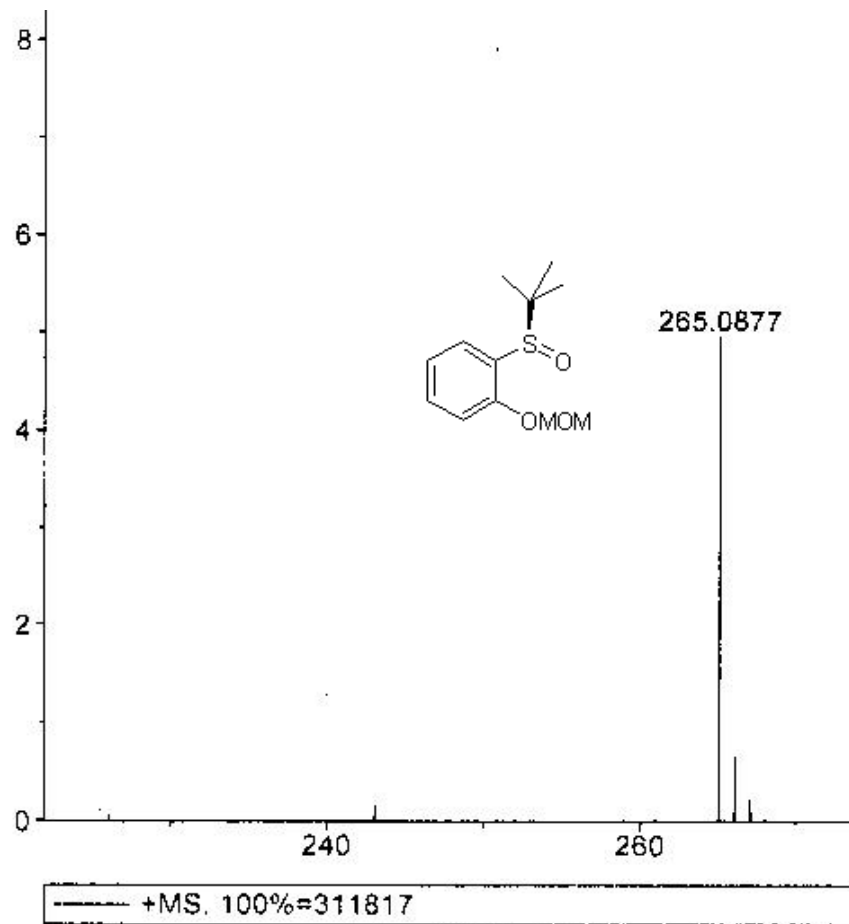

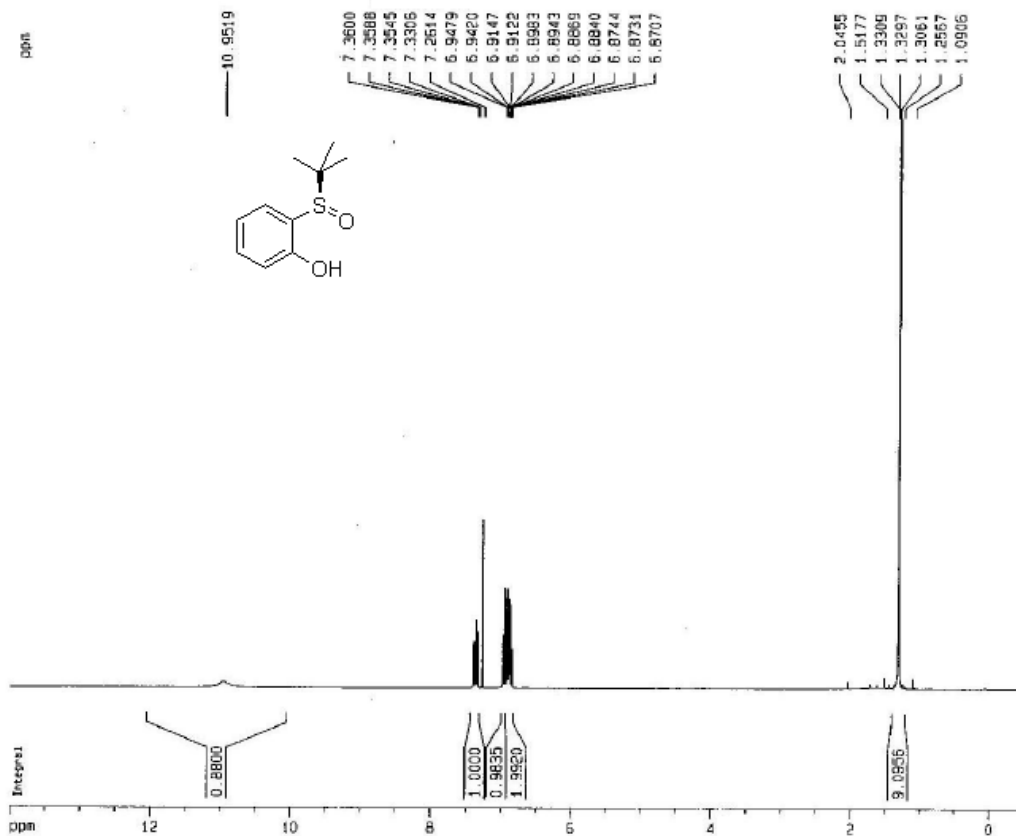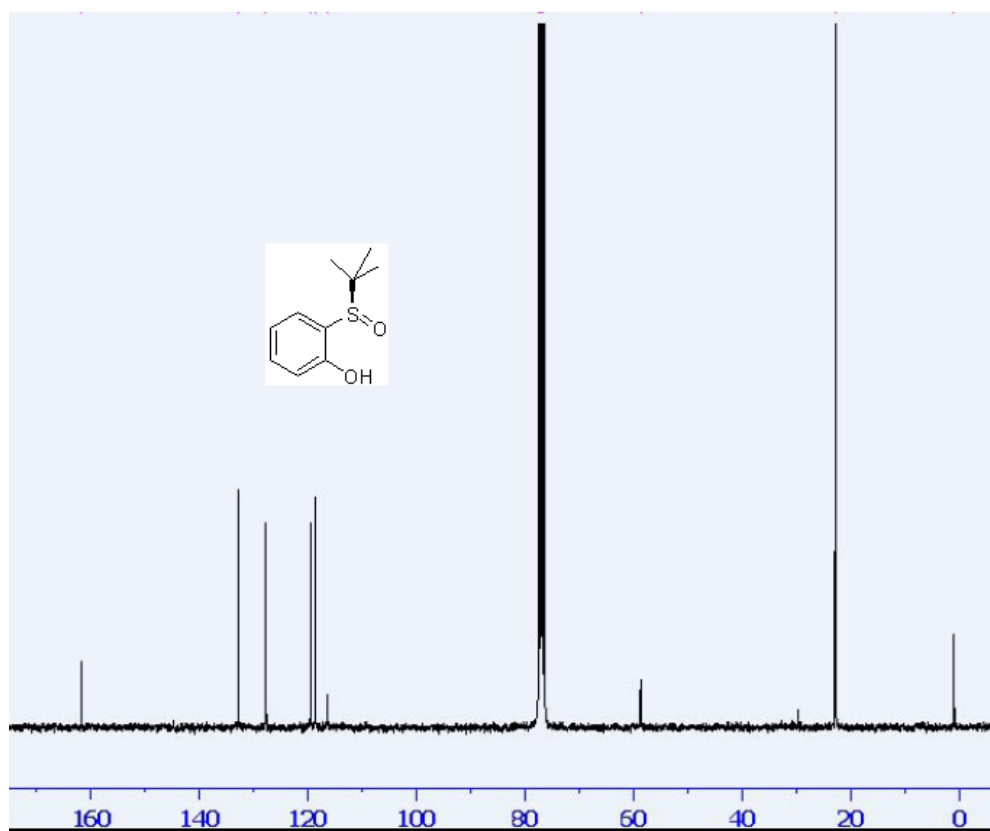



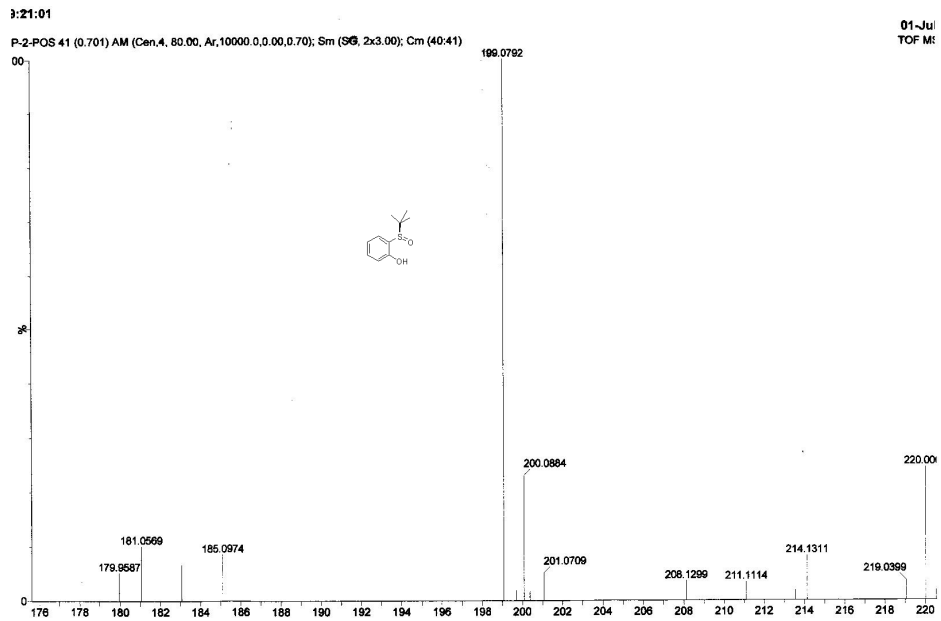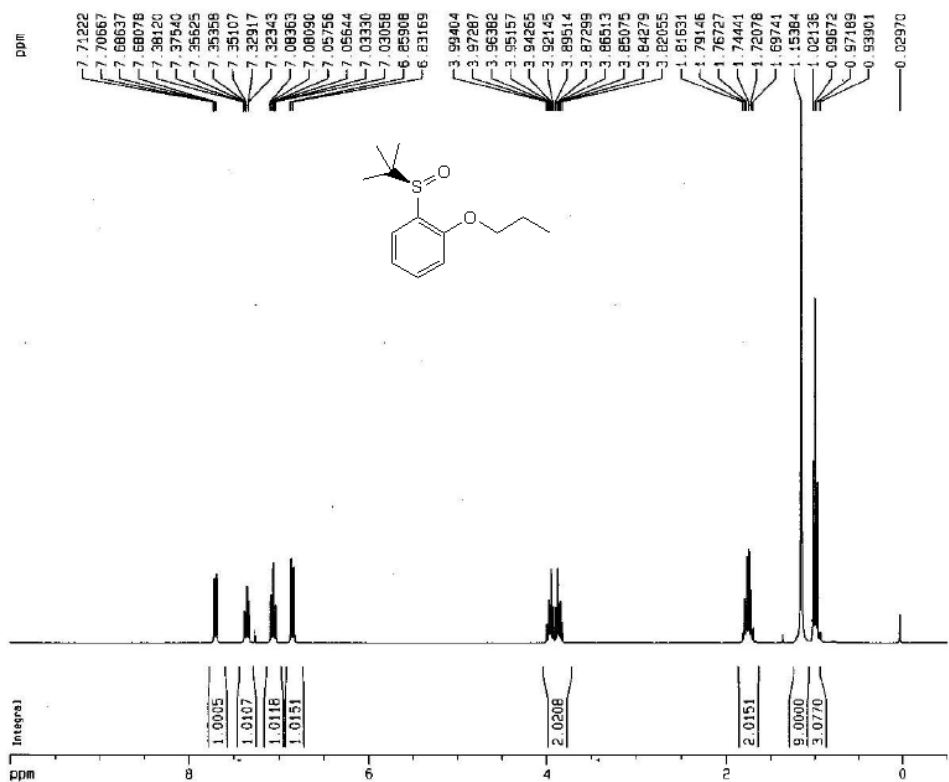

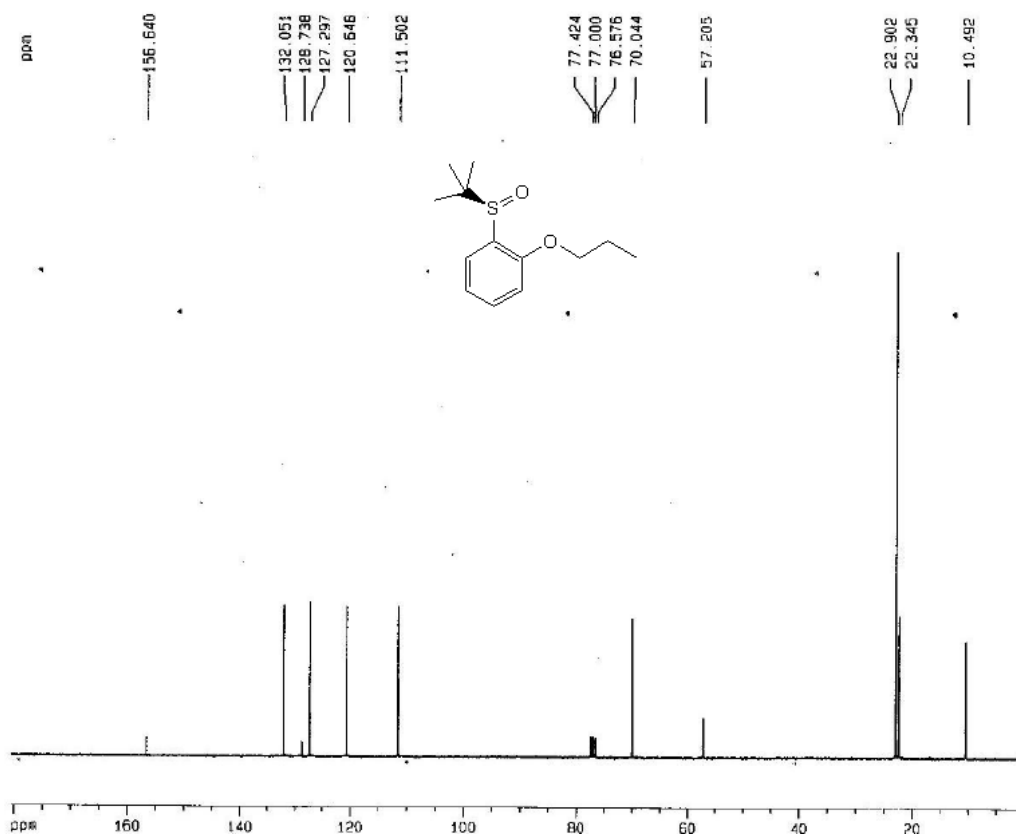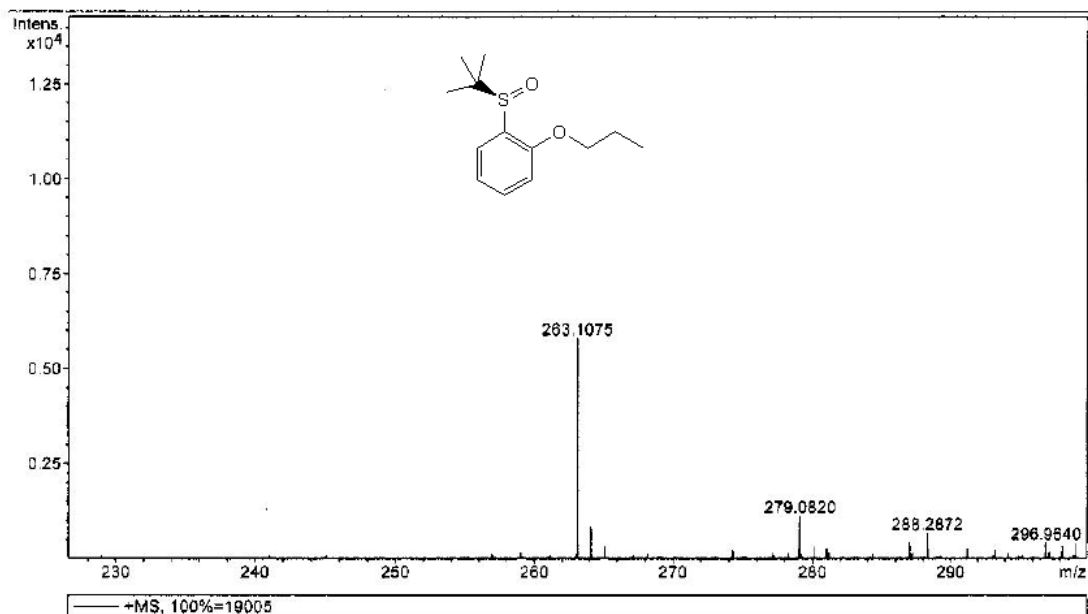

| Sum Formula                                                     | Sigma | m/z      | Err [ppm] | Mean Err [ppm] | rdb  | N Rule | e <sup>-</sup> |
|-----------------------------------------------------------------|-------|----------|-----------|----------------|------|--------|----------------|
| C <sub>13</sub> H <sub>20</sub> NaO <sub>2</sub> S <sub>1</sub> | 0.00  | 263.1076 | 0.49      | -1.05          | 3.50 | ok     | even           |

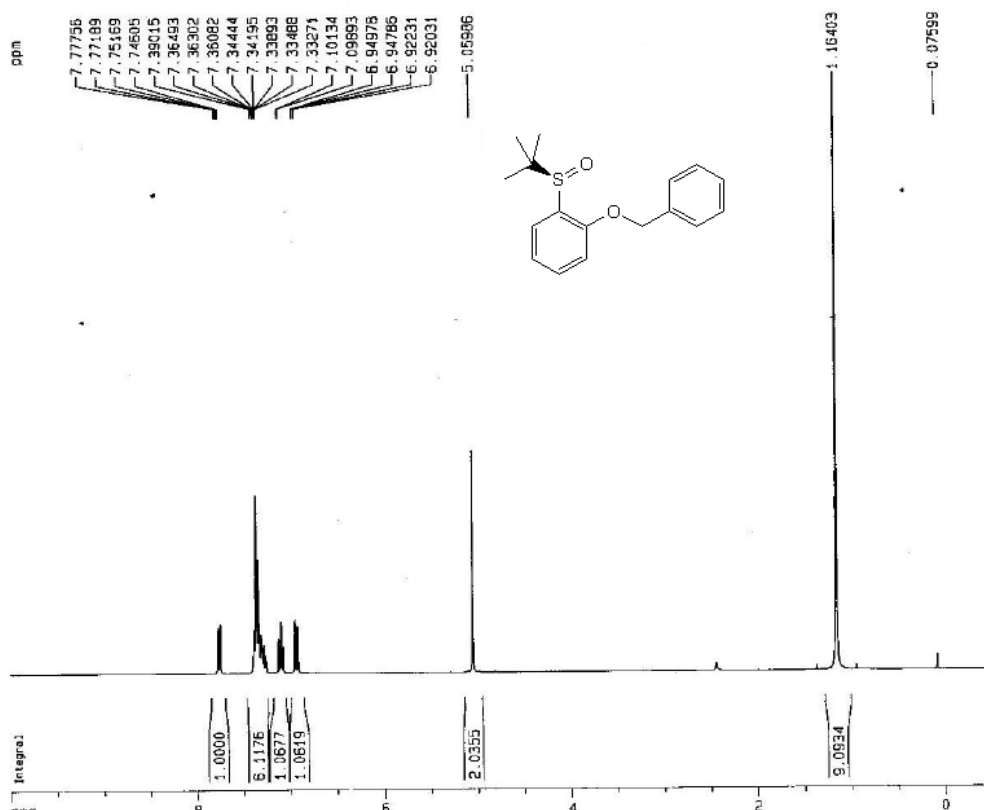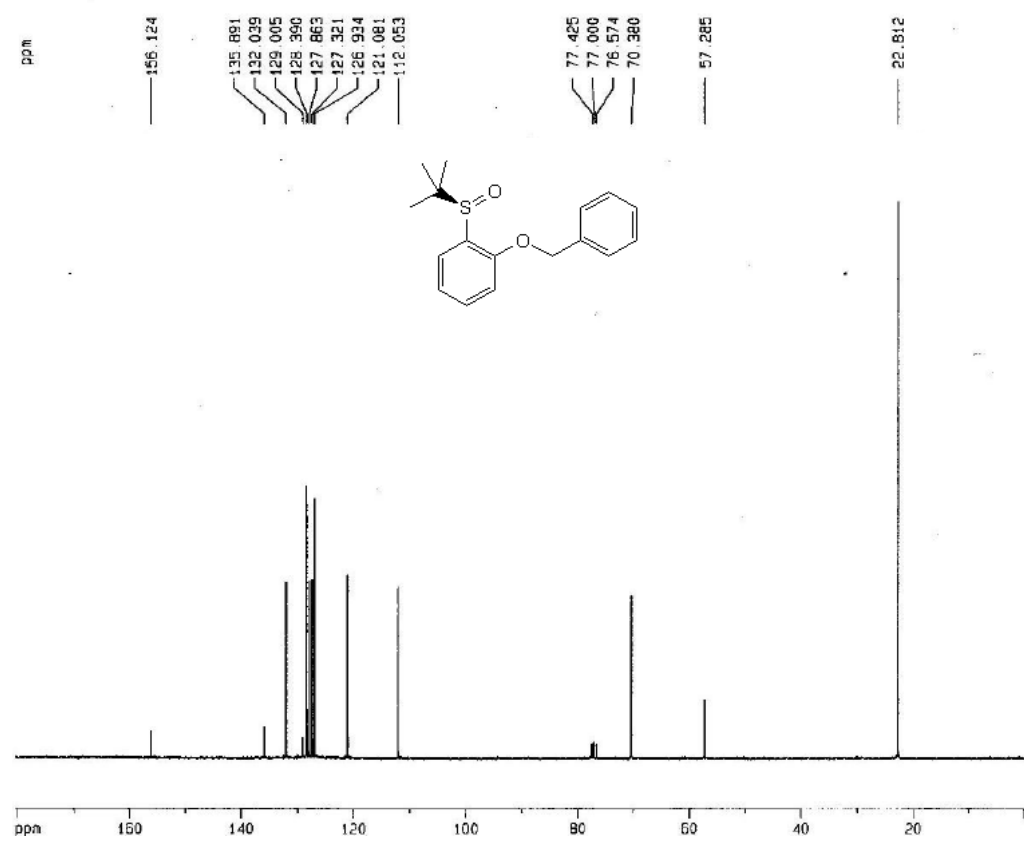

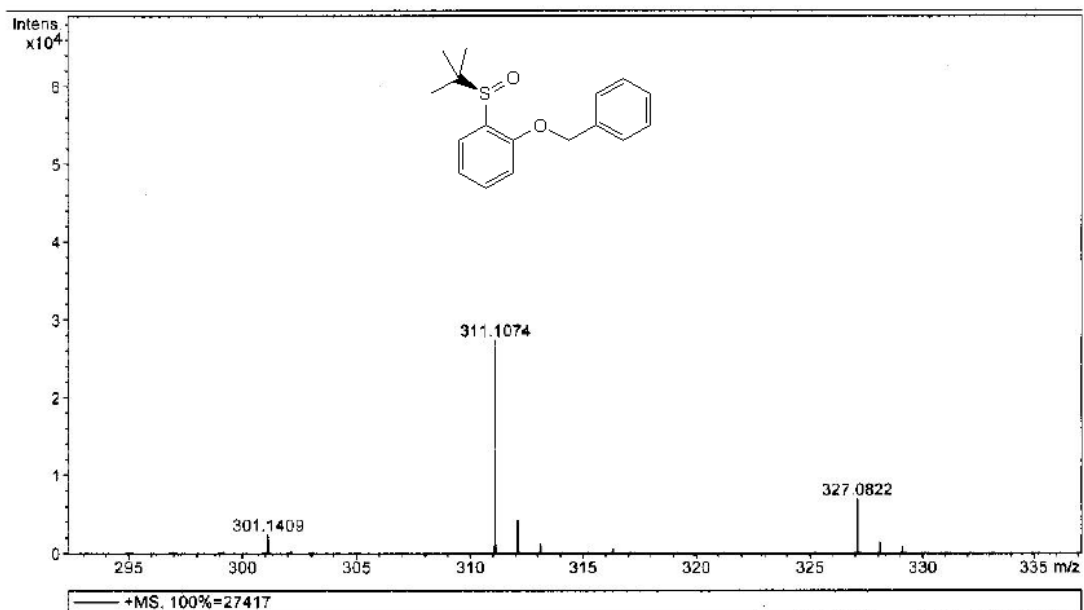

| Sum Formula            | Sigma | m/z      | Err [ppm] | Mean Err [ppm] | rdb  | N Rule | e <sup>-</sup> |
|------------------------|-------|----------|-----------|----------------|------|--------|----------------|
| C 17 H 20 Na 1 O 2 S 1 | 0.02  | 311.1076 | 0.81      | -8.73          | 7.50 | ok     | even           |

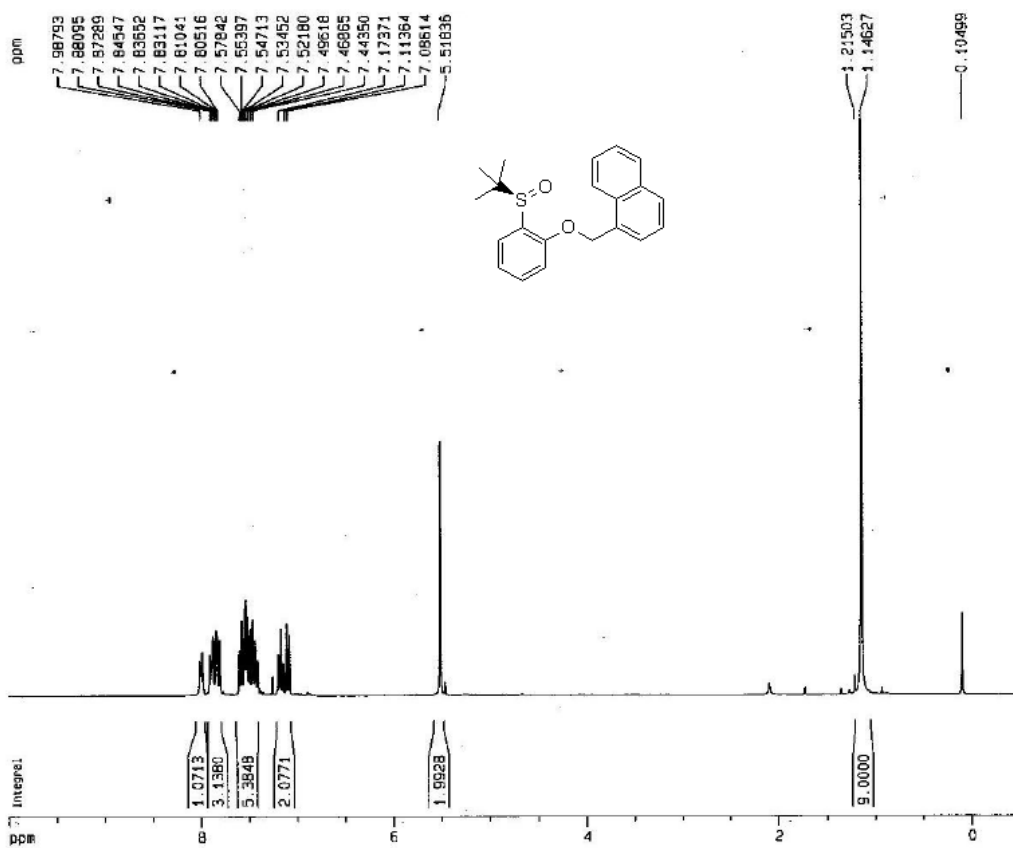

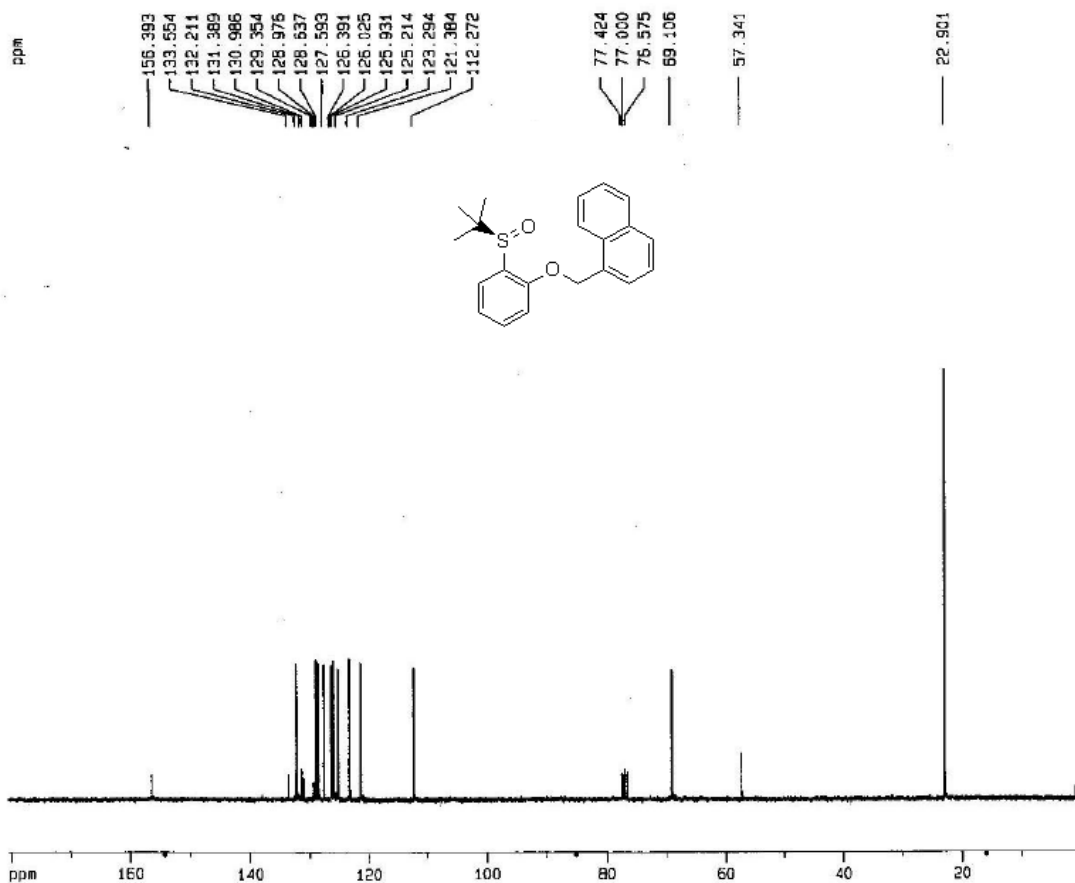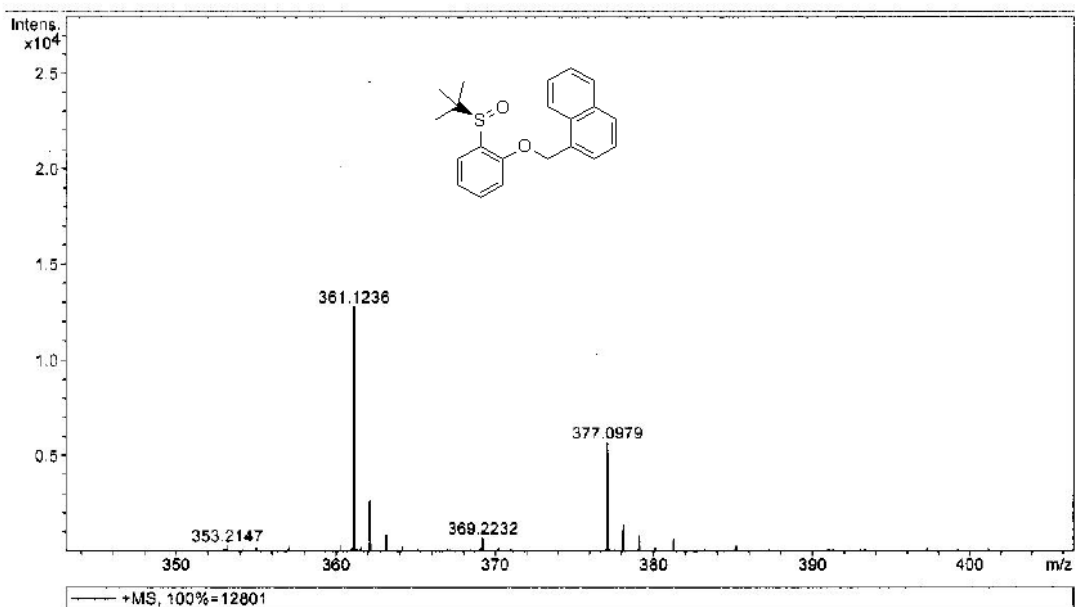

| Sum  | Formula | Sigma | m/z | Err [ppm] | Mean Err [ppm] | rdb      | N Rule | e <sup>-</sup> |       |    |      |
|------|---------|-------|-----|-----------|----------------|----------|--------|----------------|-------|----|------|
| C 21 | H 22    | Na 1  | O 2 | S 1       | 0.02           | 361.1233 | -0.93  | -1.39          | 10.50 | ck | even |

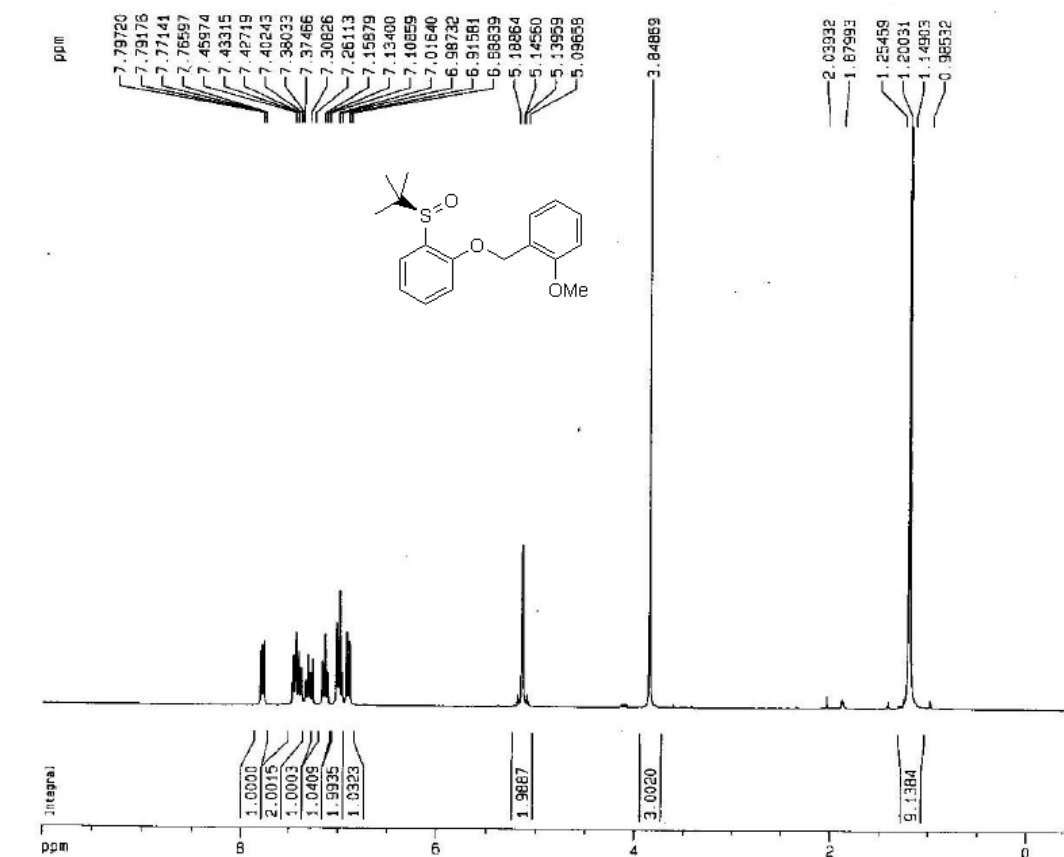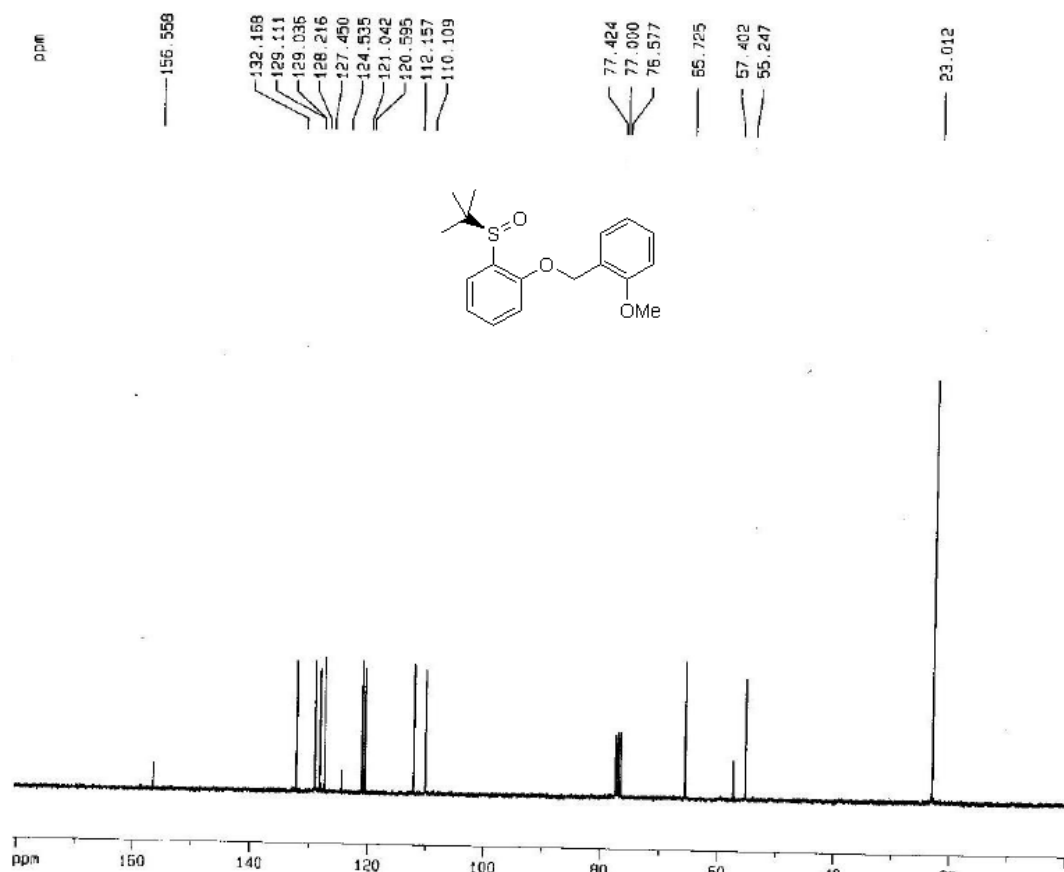

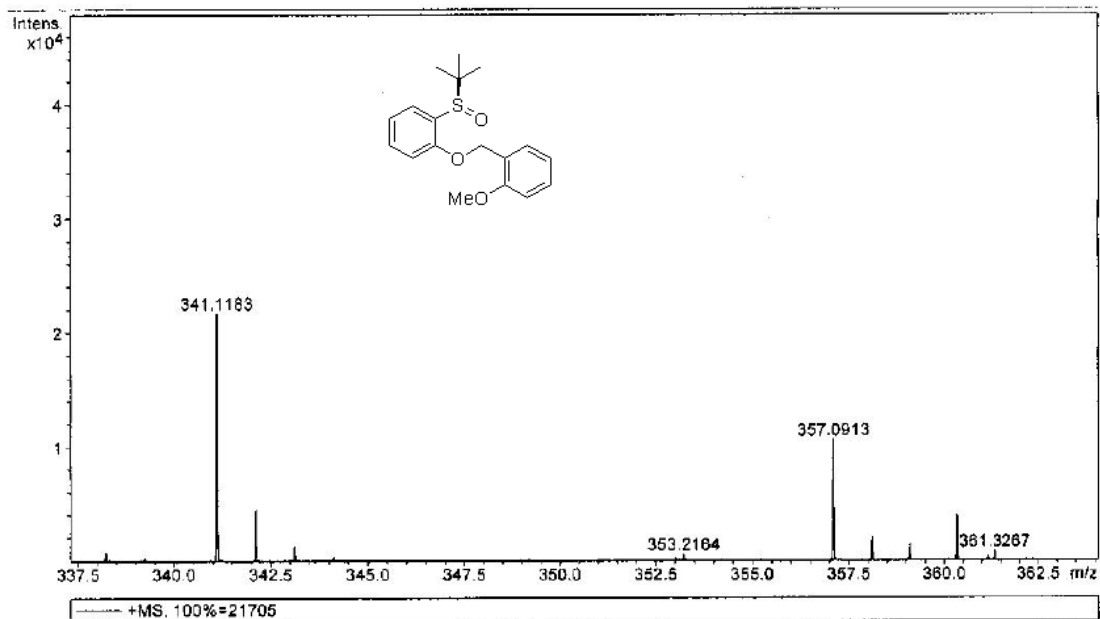

| Sum  | Formula | Sigma | m/z | Err [ppm] | Mean Err [ppm] | rdb      | N Rule | e <sup>-</sup> |      |    |      |
|------|---------|-------|-----|-----------|----------------|----------|--------|----------------|------|----|------|
| C 18 | H 22    | Na 1  | O 3 | S 1       | 0.01           | 341.1182 | -0.46  | -1.13          | 7.50 | ok | even |

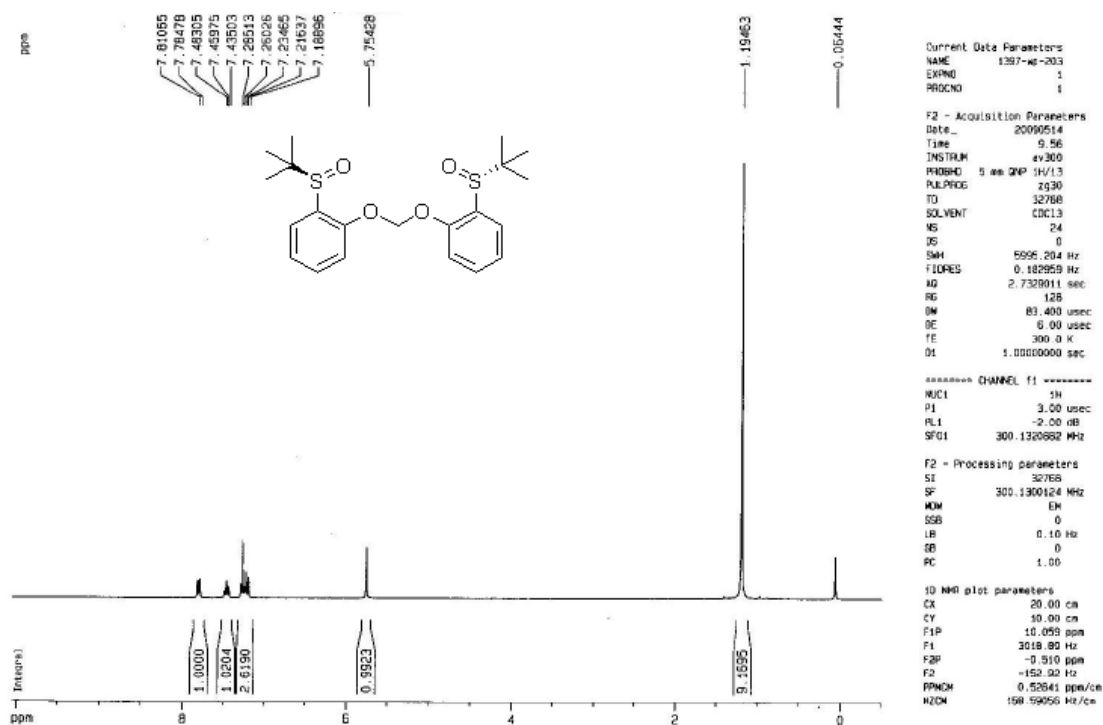

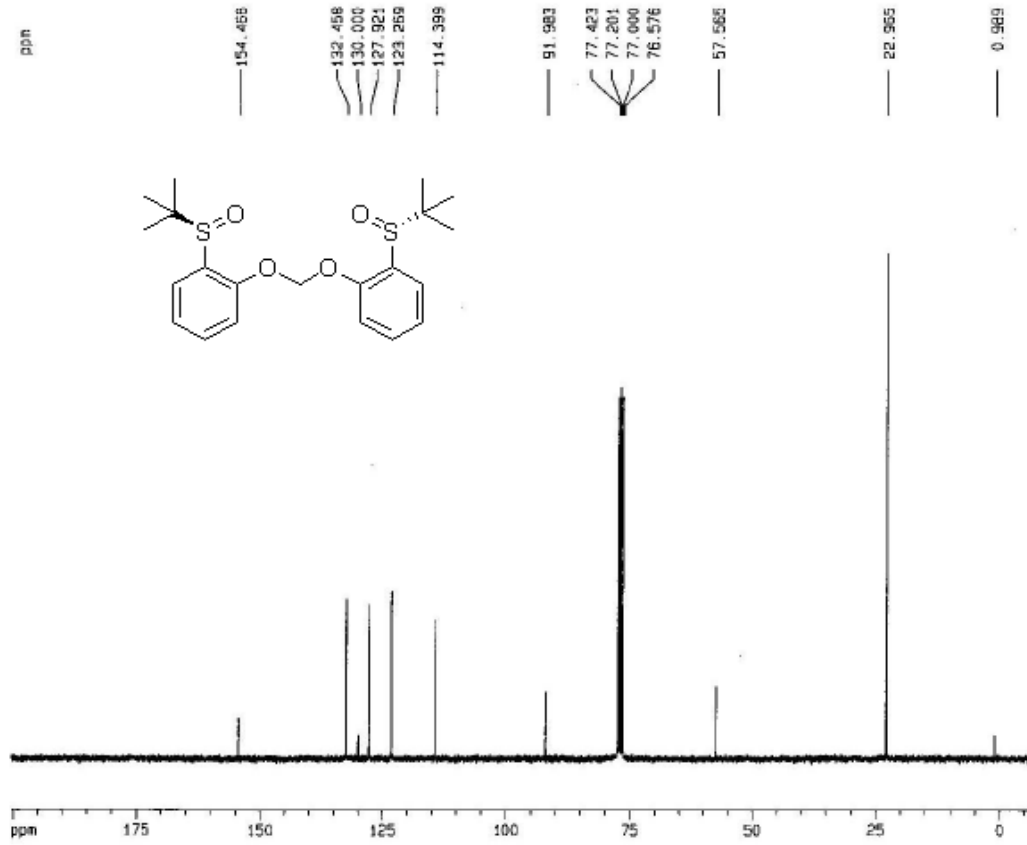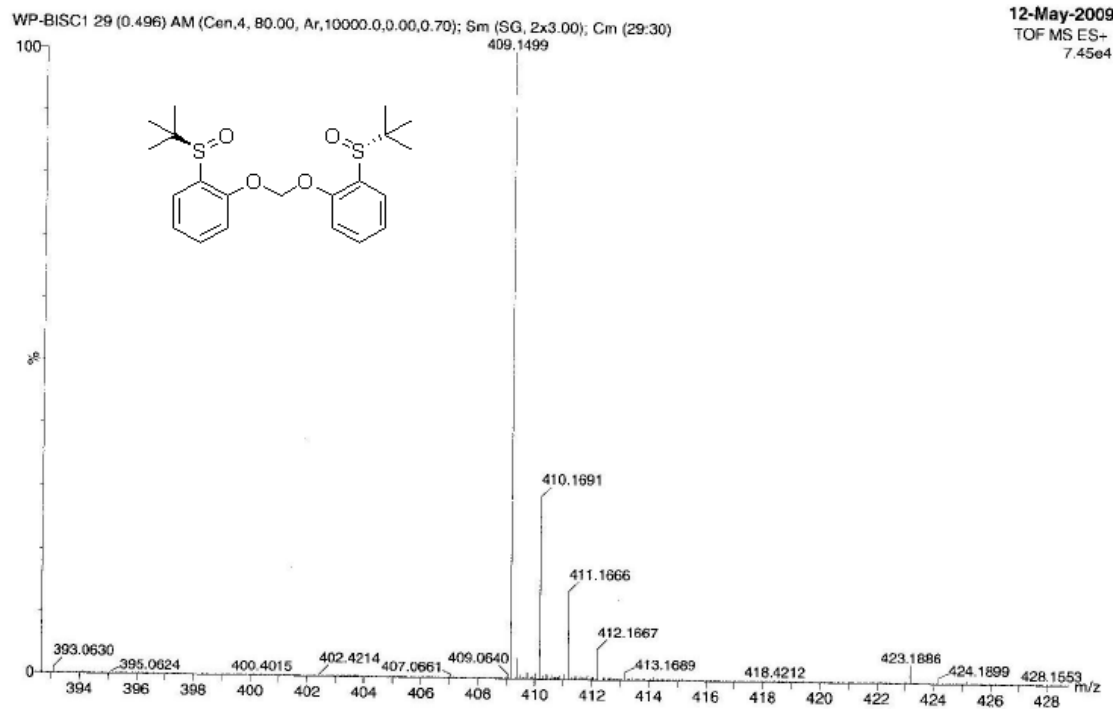



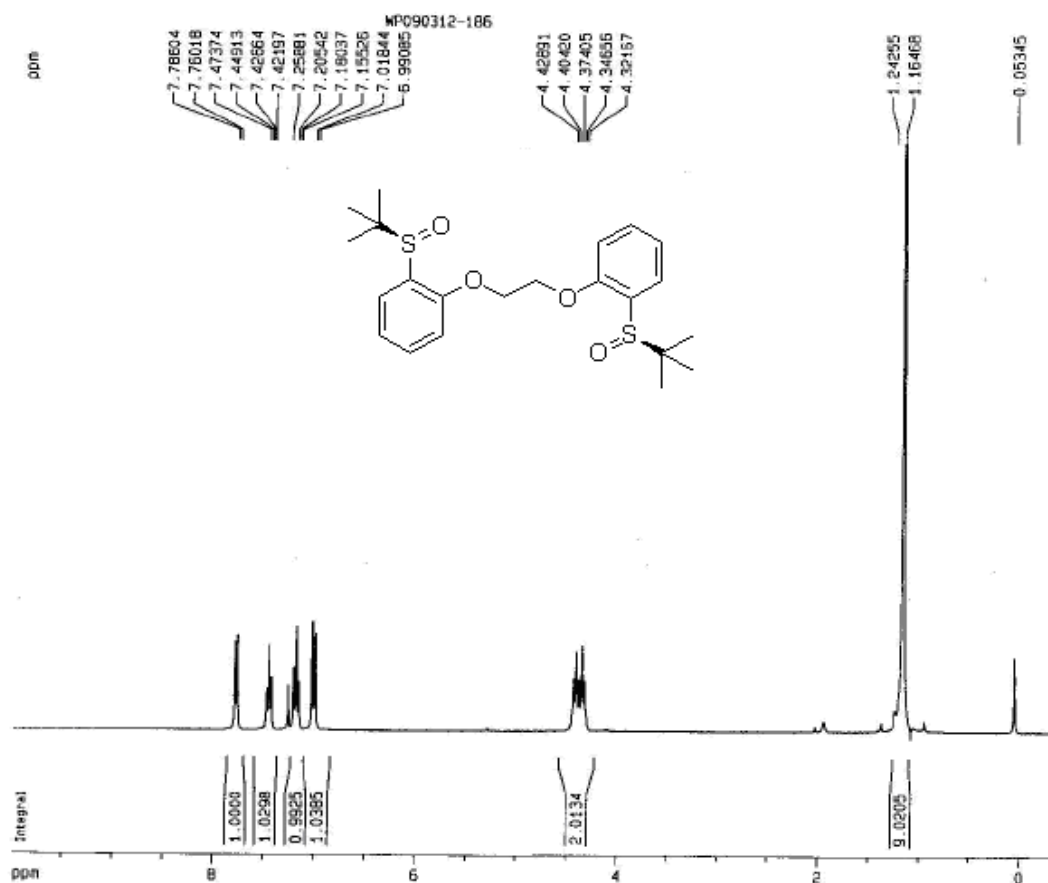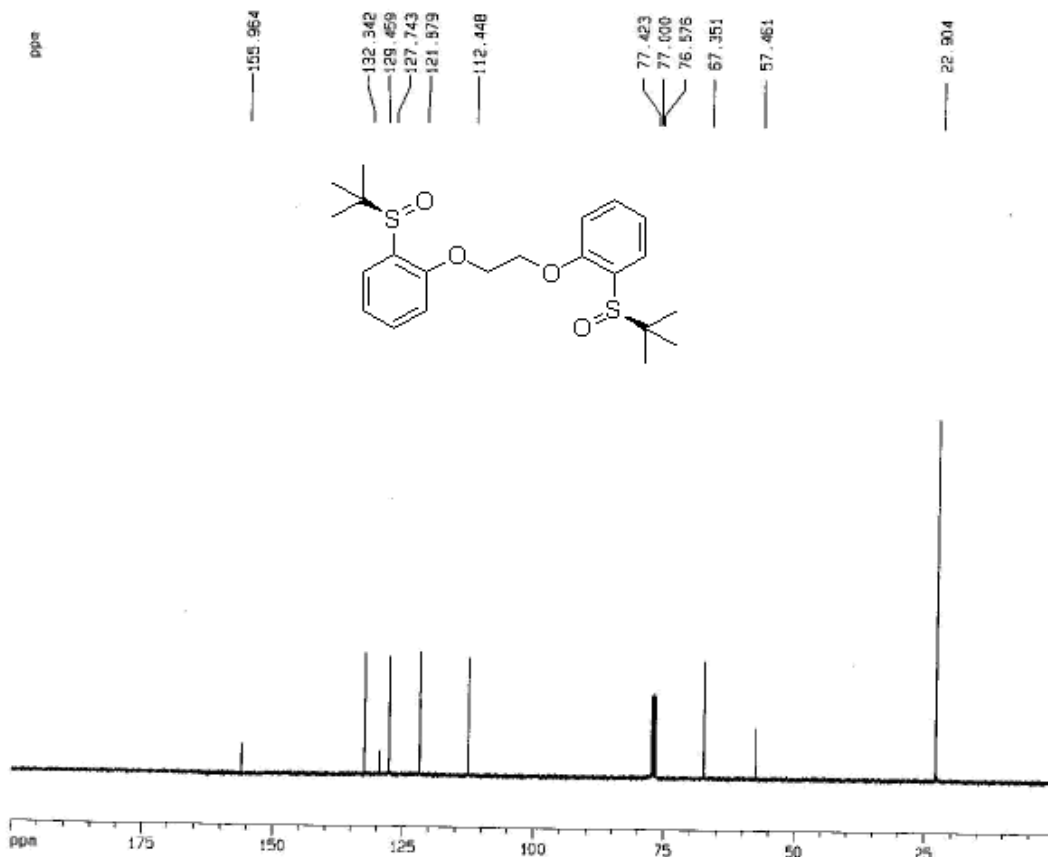

WP-BISC2 29 (0.496) AM (Cen,4, 80.00, Ar,10000.0,0.00,0.70); Sm (SG, 2x3.00); Cm (29)

12-May-2009  
TOF MS ES+  
1.13e4

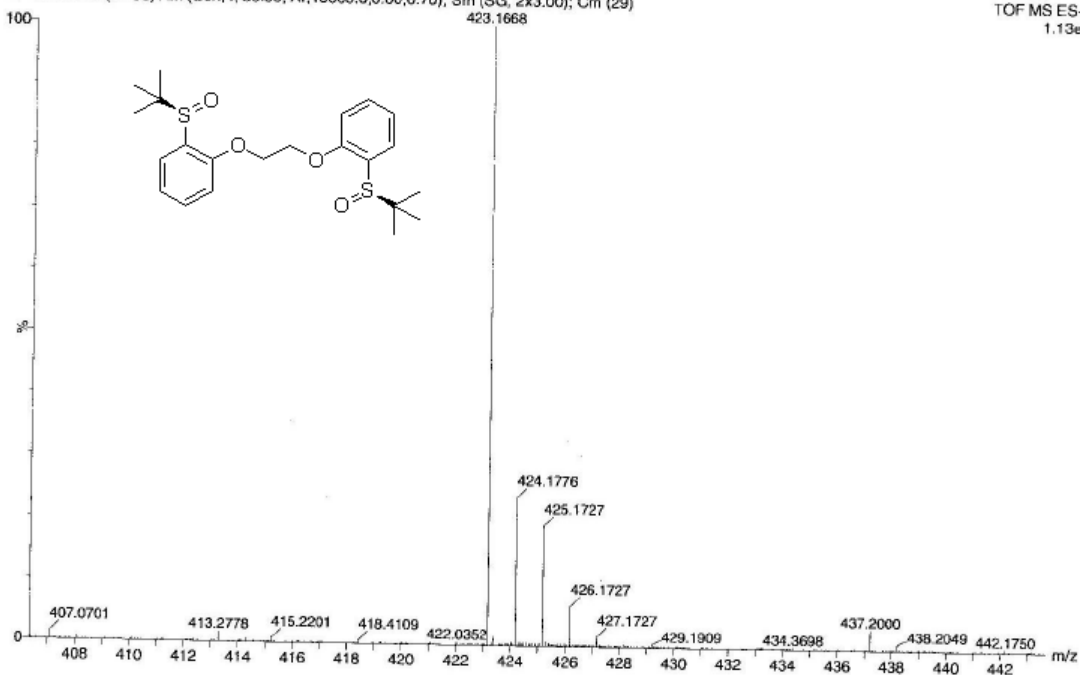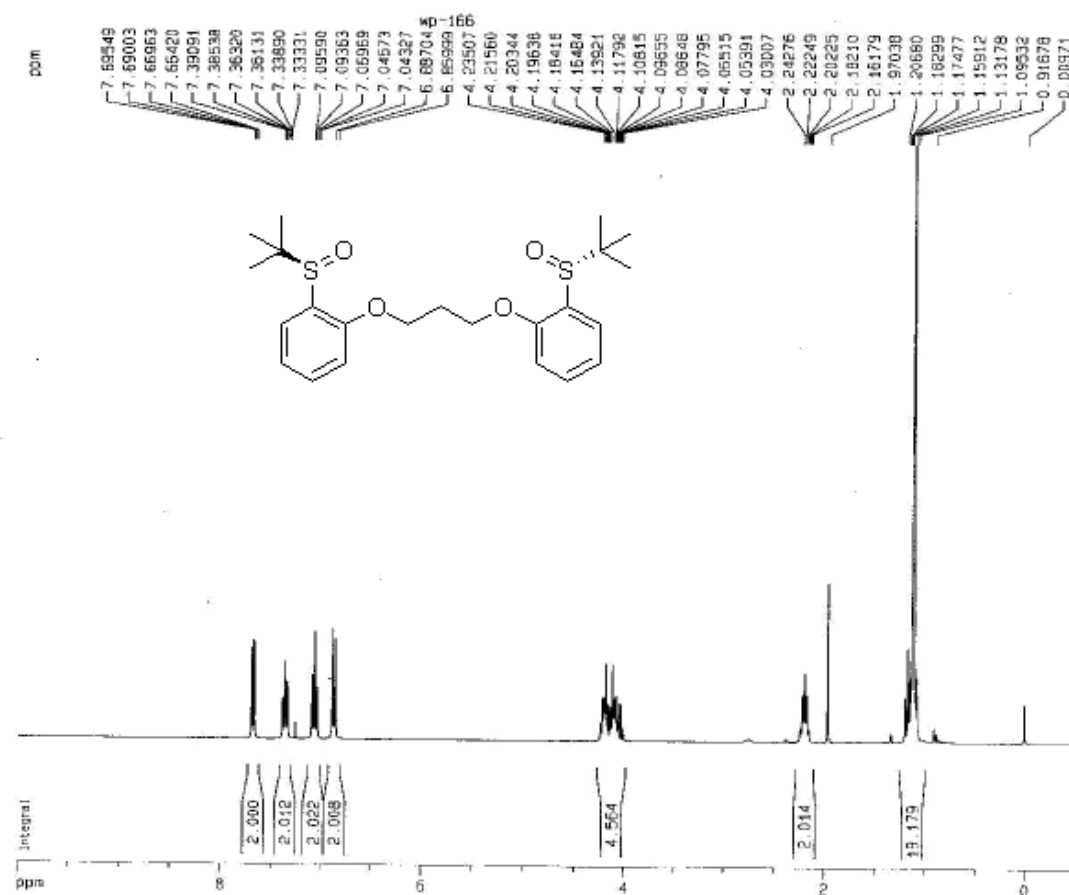

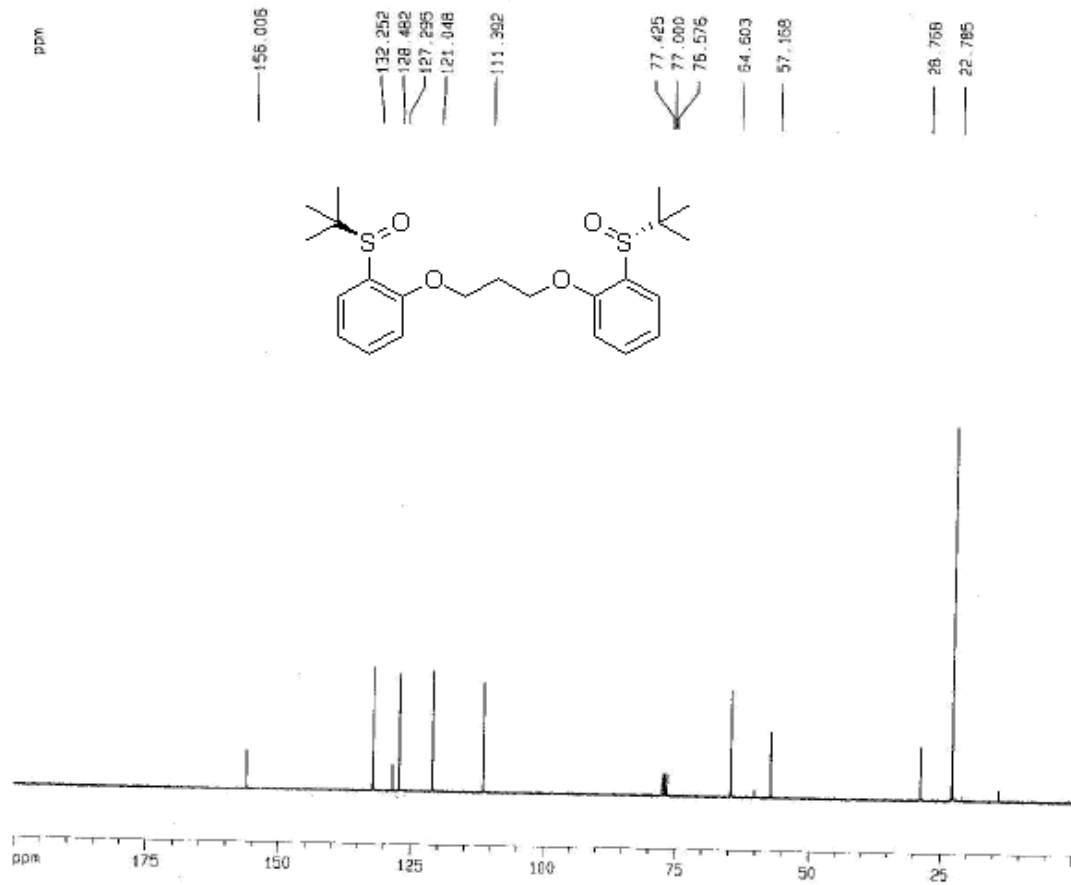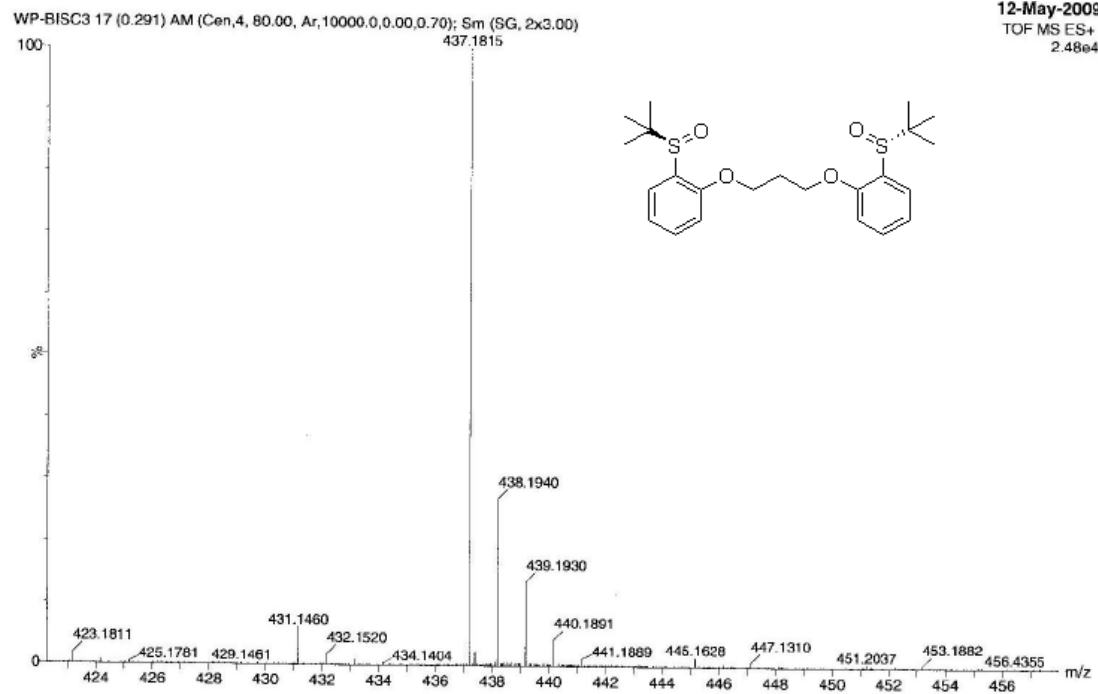

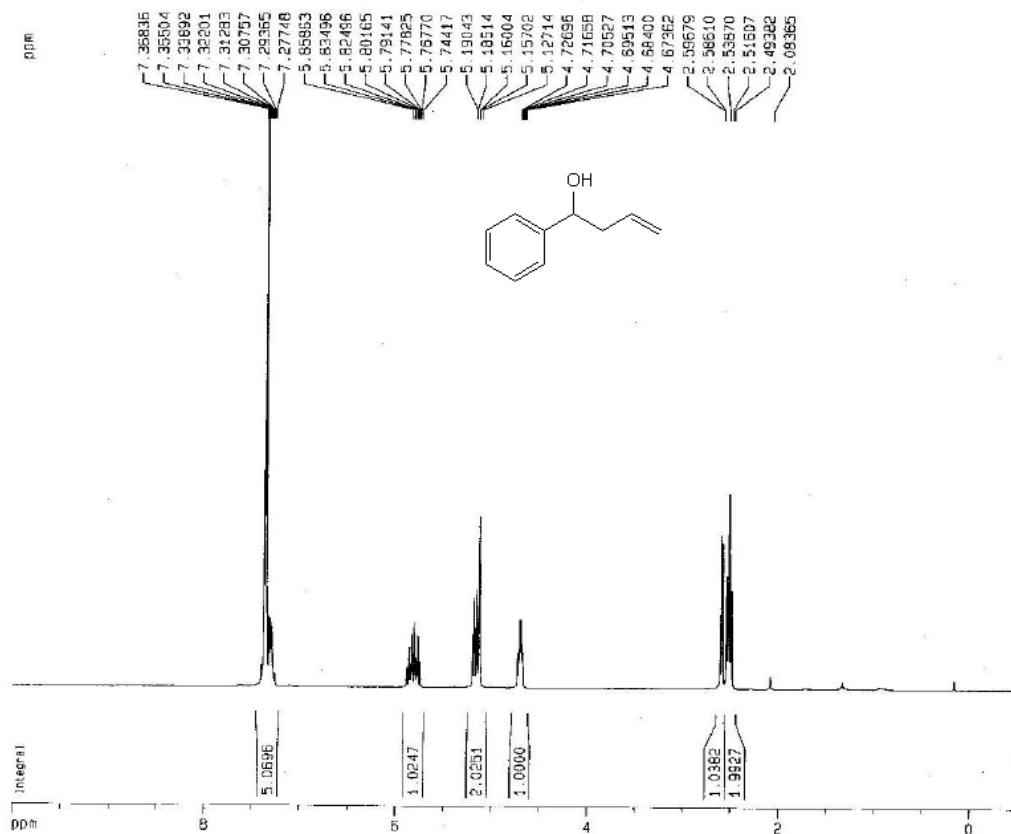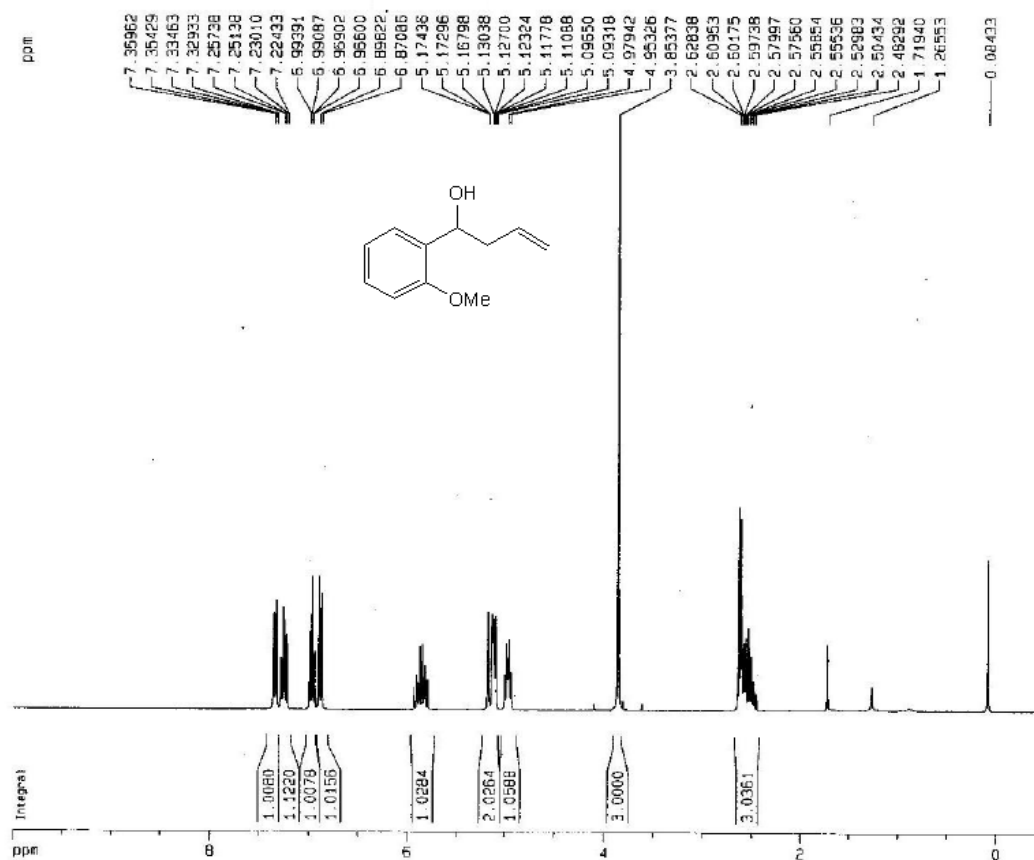

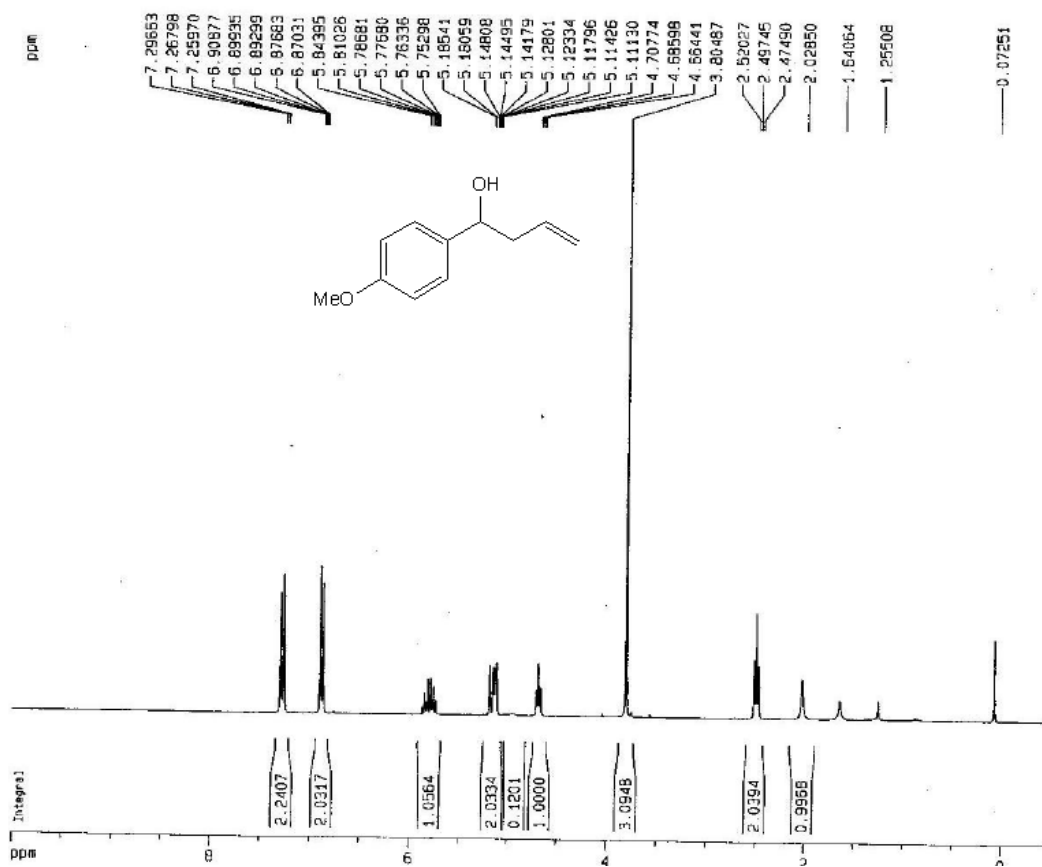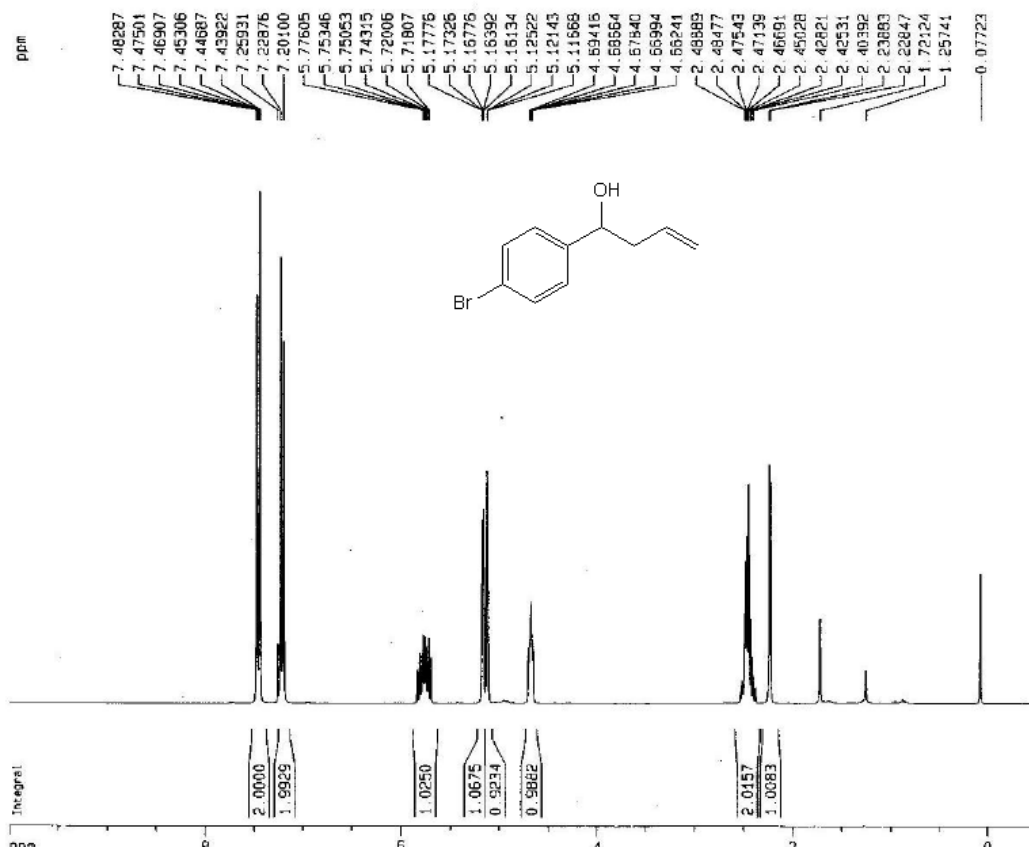

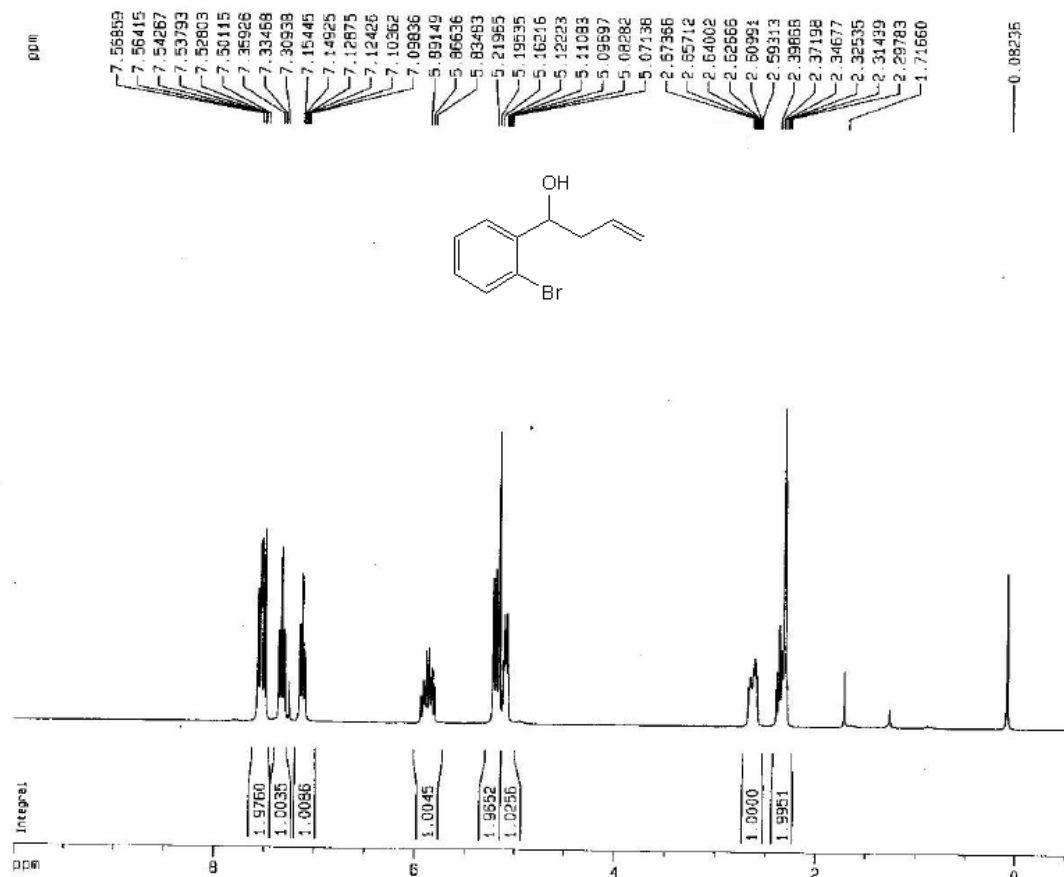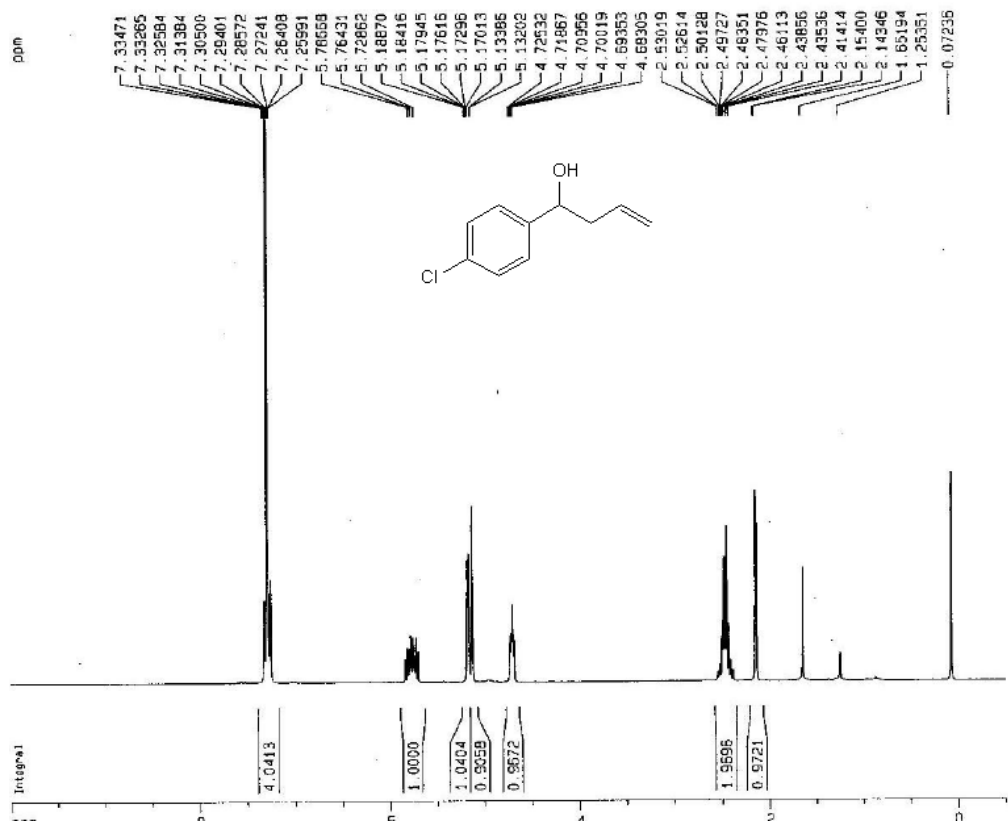

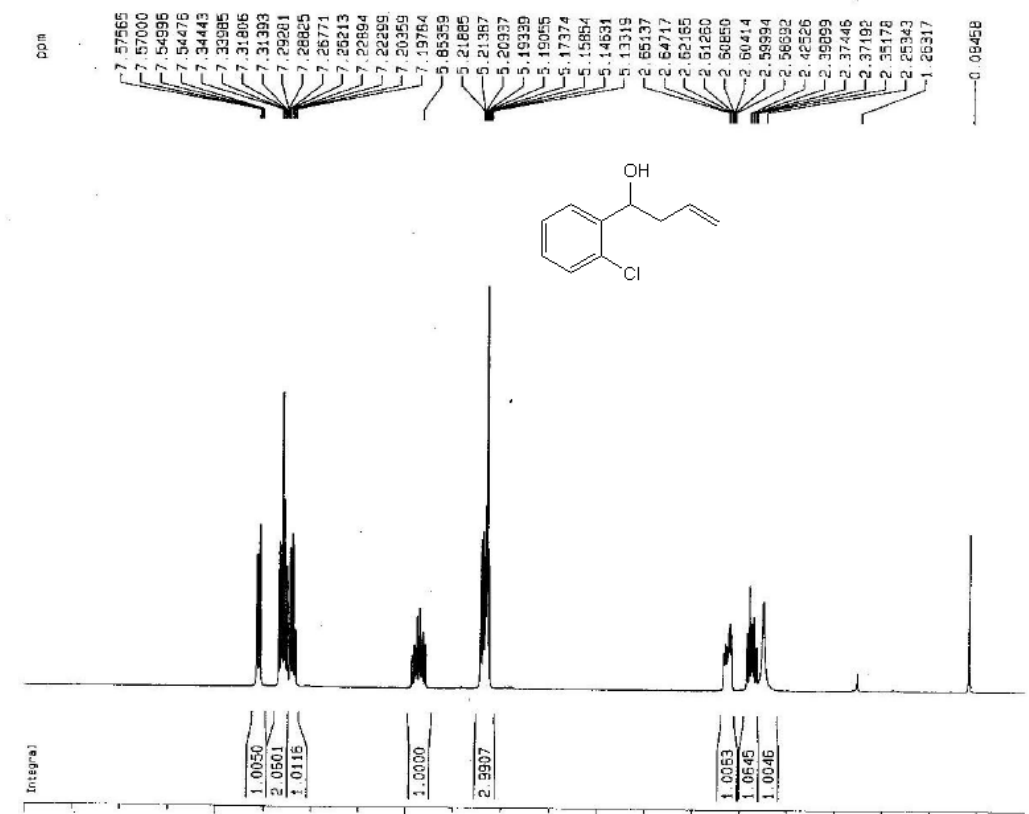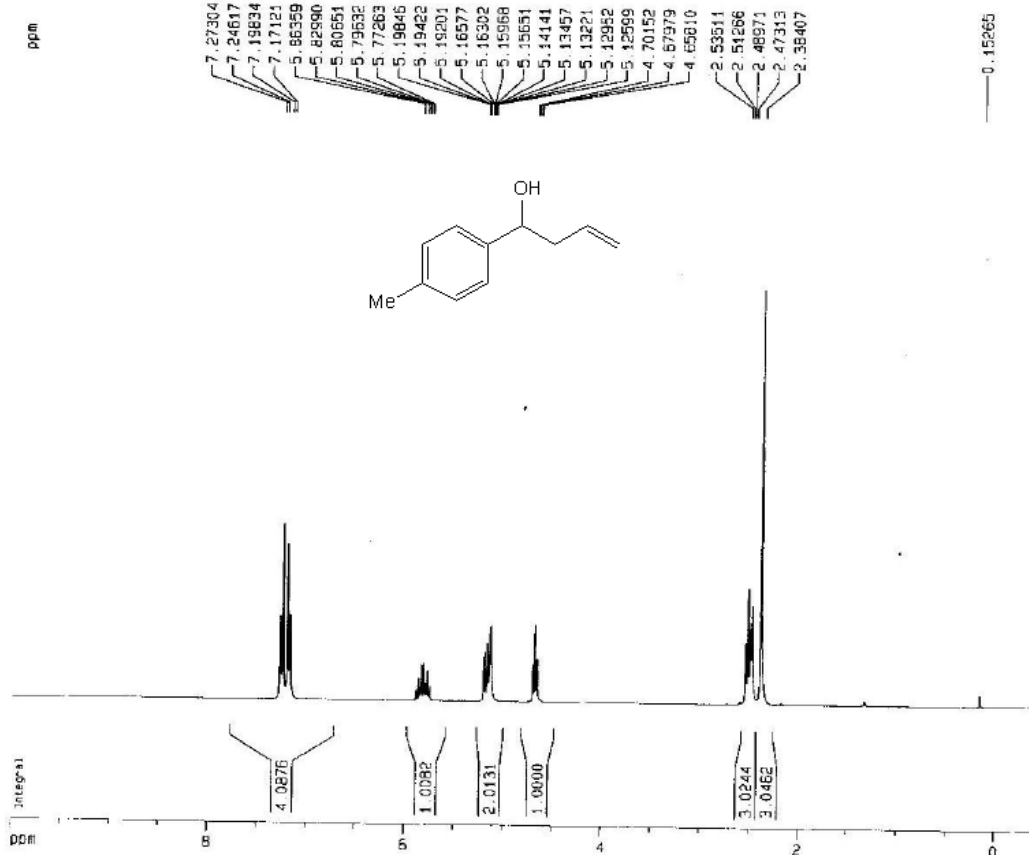

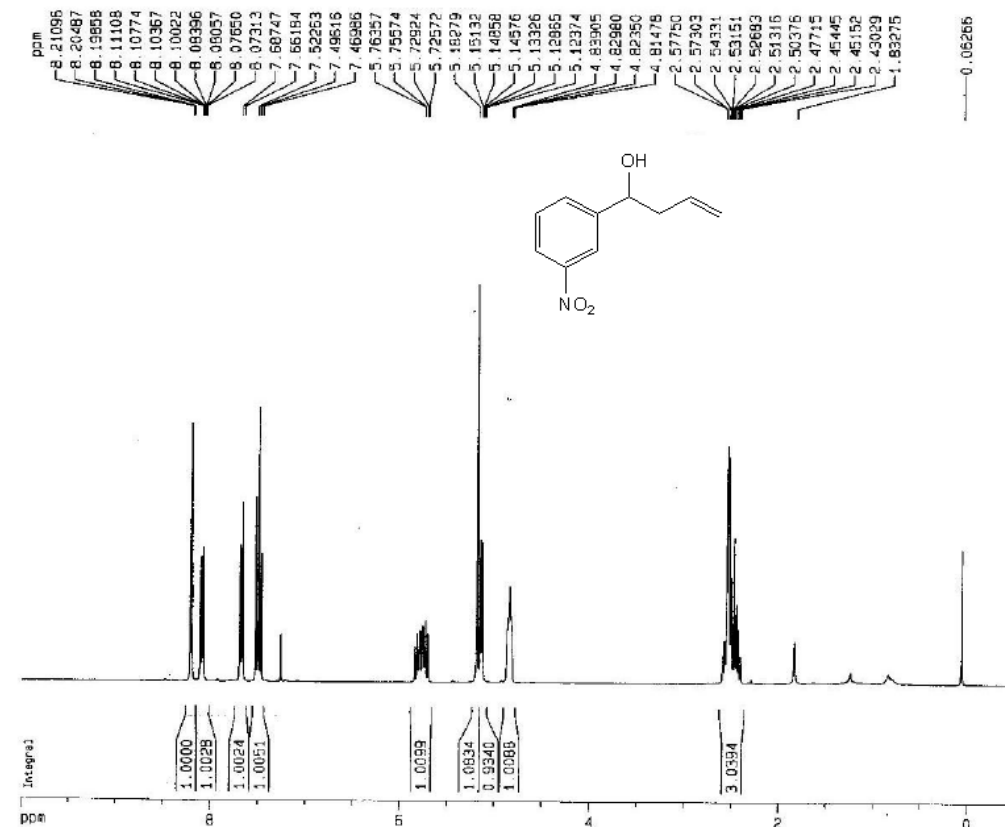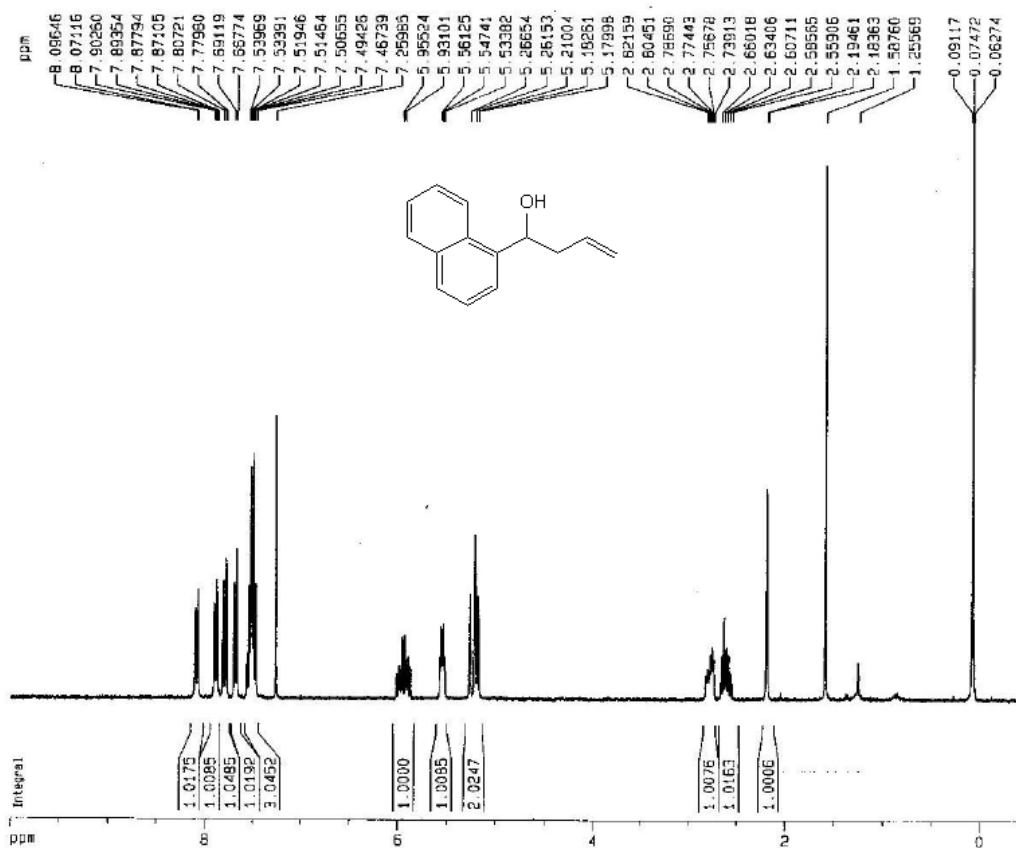



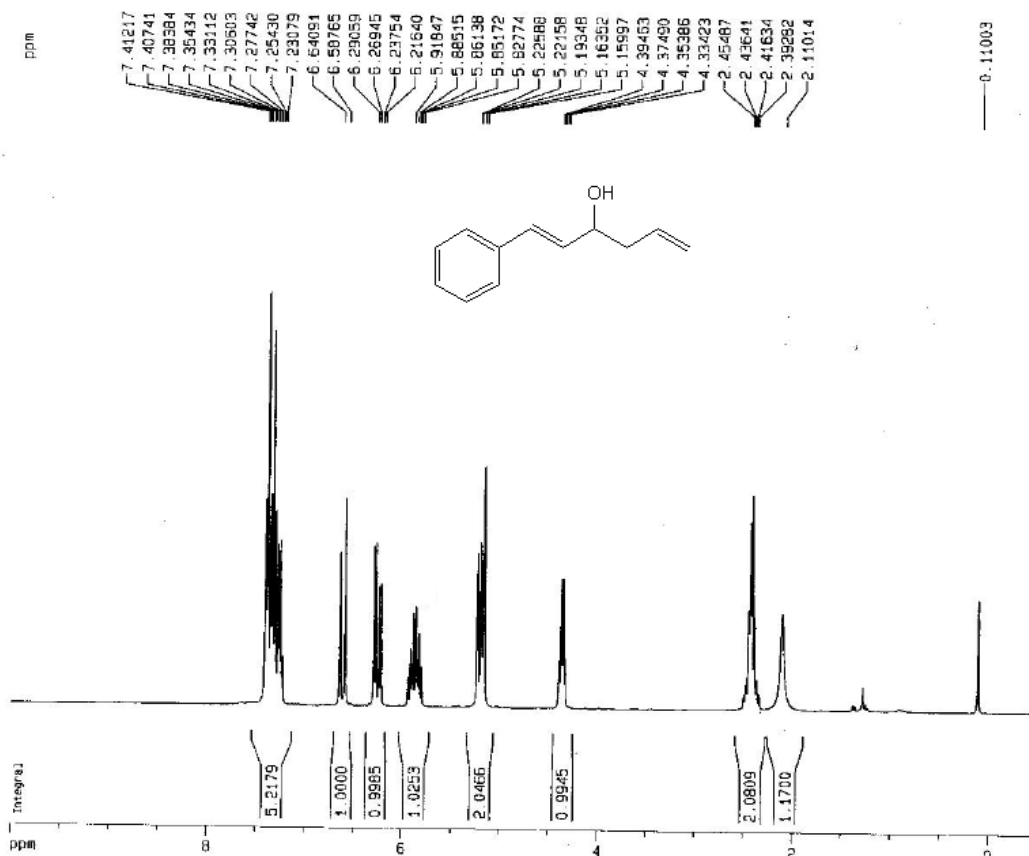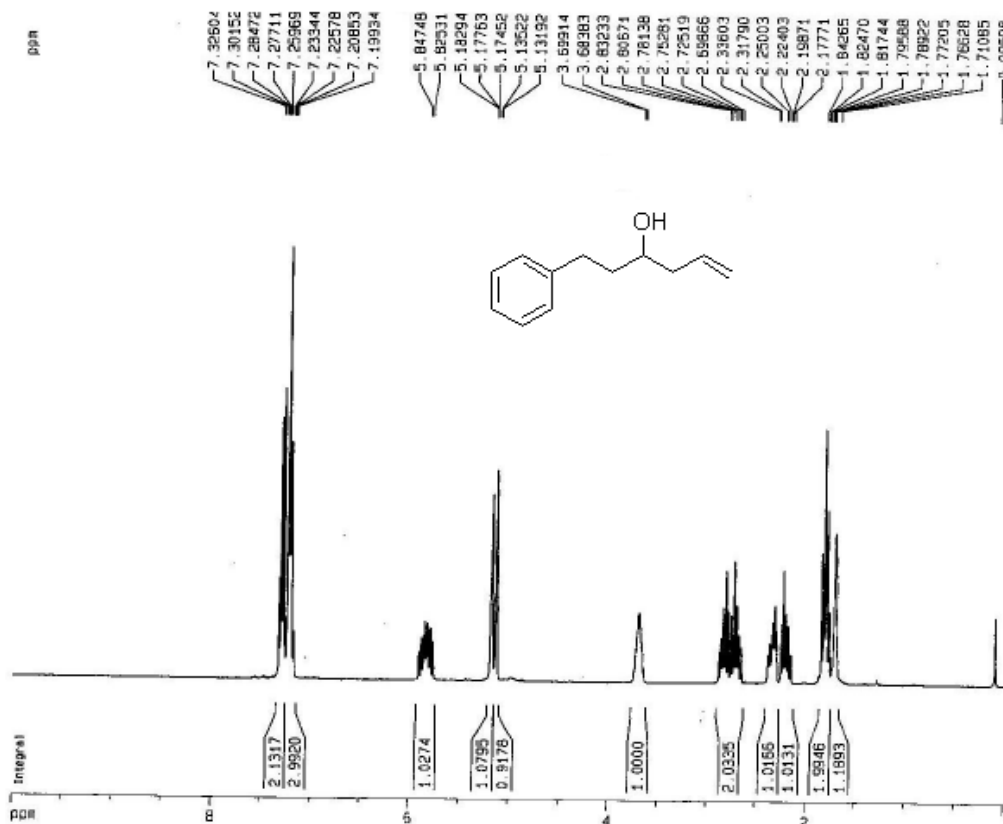

## 2. HPLC and GC chromatograms

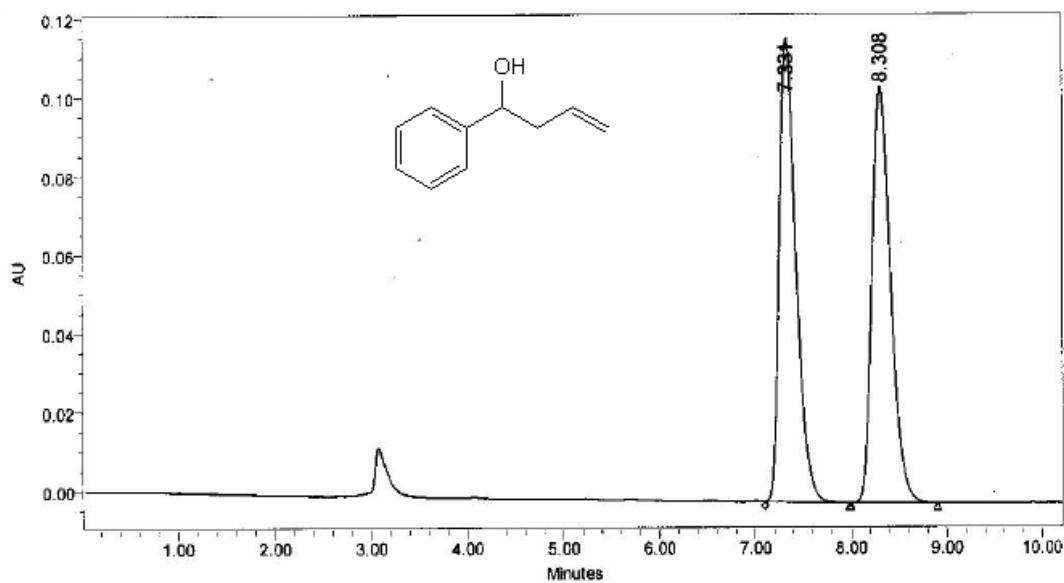

|   | RT (min) | Area ( $\mu\text{V}\cdot\text{sec}$ ) | % Area | Height ( $\mu\text{V}$ ) | % Height |
|---|----------|---------------------------------------|--------|--------------------------|----------|
| 1 | 7.331    | 1419041                               | 49.98  | 117965                   | 52.61    |
| 2 | 8.308    | 1420375                               | 50.02  | 106272                   | 47.39    |

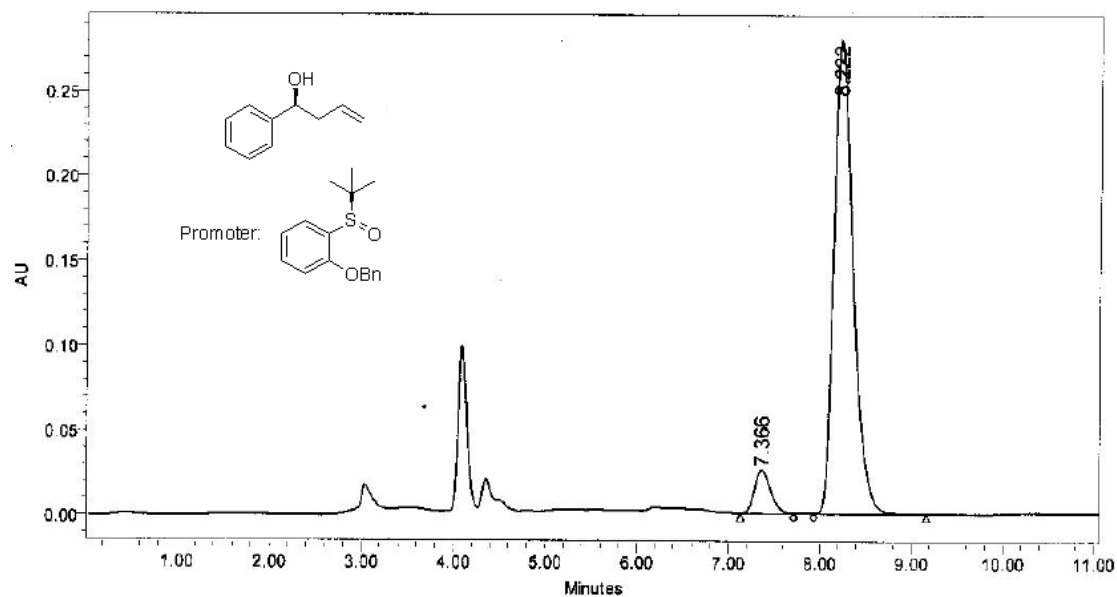

|   | RT (min) | Area ( $\mu\text{V}\cdot\text{sec}$ ) | % Area | Height ( $\mu\text{V}$ ) | % Height |
|---|----------|---------------------------------------|--------|--------------------------|----------|
| 1 | 7.366    | 310629                                | 7.08   | 25666                    | 8.38     |
| 2 | 8.222    | 4073710                               | 92.92  | 280542                   | 91.62    |

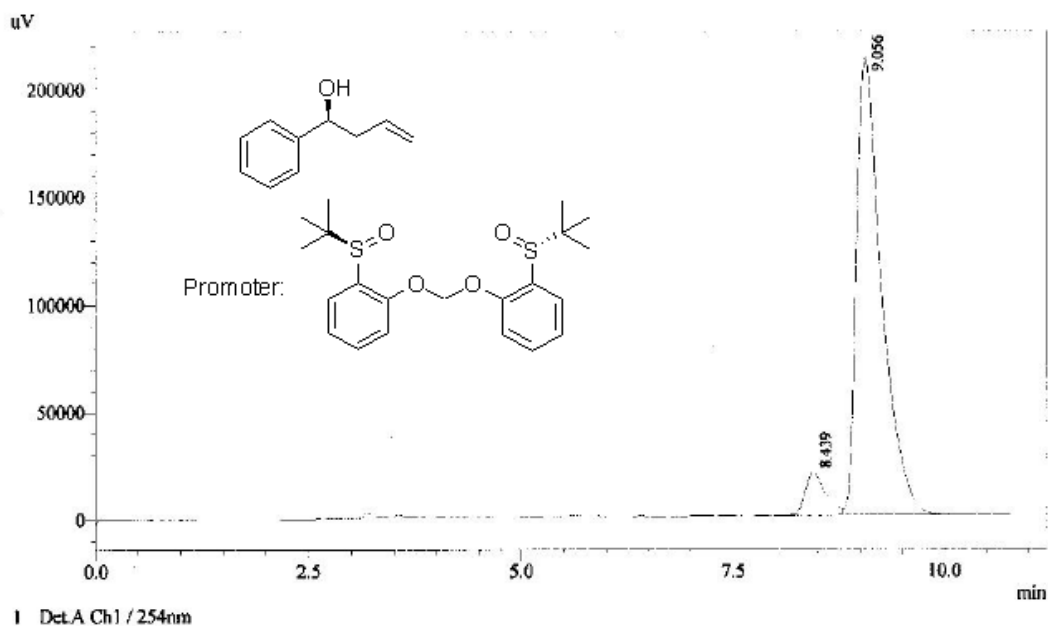

Detector A Ch1 254nm

| Peak# | Ret. Time | Area    | Height | Area %  | Height % |
|-------|-----------|---------|--------|---------|----------|
| 1     | 8.439     | 328765  | 19770  | 6.935   | 8.505    |
| 2     | 9.056     | 4411899 | 212691 | 93.065  | 91.495   |
| Total |           | 4740663 | 232461 | 100.000 | 100.000  |

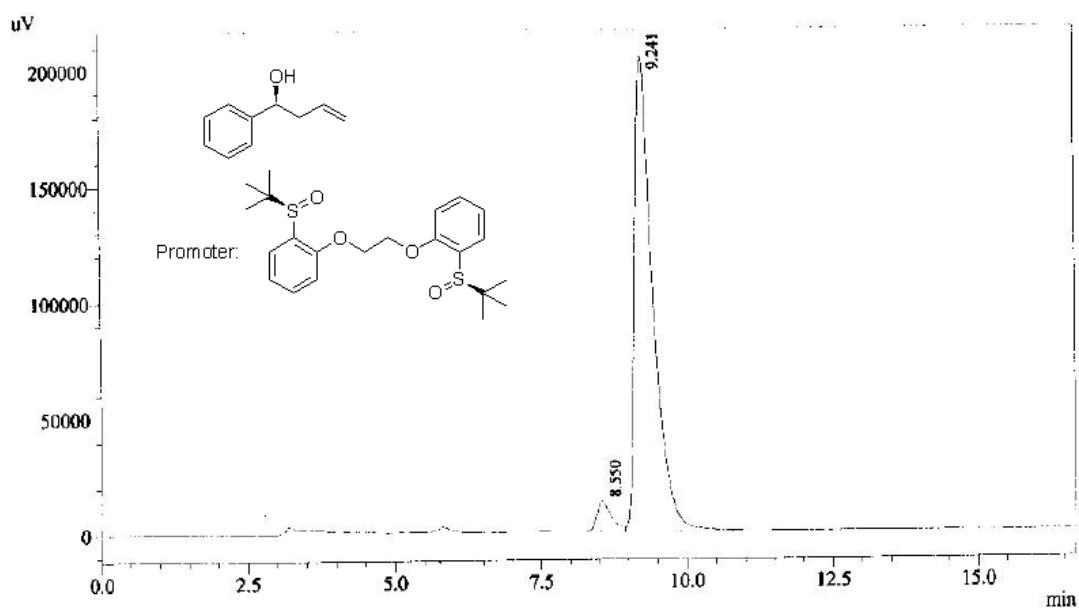

Detector A Ch1 254nm

| Peak# | Ret. Time | Area    | Height | Area %  | Height % |
|-------|-----------|---------|--------|---------|----------|
| 1     | 8.550     | 223223  | 12958  | 4.790   | 5.952    |
| 2     | 9.241     | 4436733 | 204736 | 95.210  | 94.048   |
| Total |           | 4659956 | 217694 | 100.000 | 100.000  |

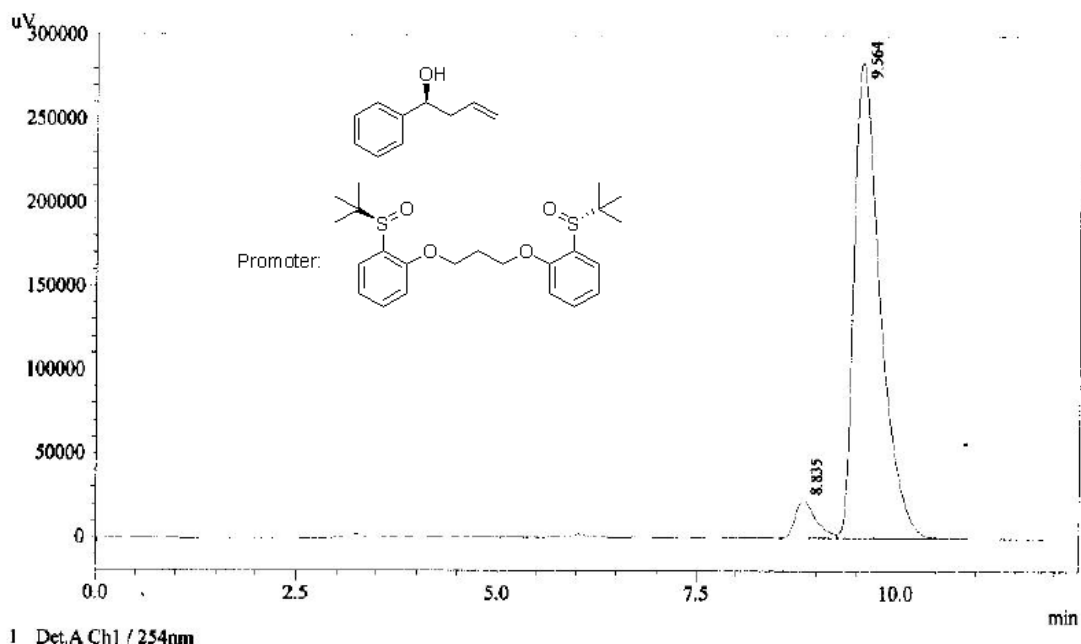

Detector A Ch1 254nm

| Peak# | Ret. Time | Area    | Height | Area %  | Height % |
|-------|-----------|---------|--------|---------|----------|
| 1     | 8.835     | 411647  | 22992  | 5.966   | 7.483    |
| 2     | 9.564     | 6488016 | 284253 | 94.034  | 92.517   |
| Total |           | 6899663 | 307245 | 100.000 | 100.000  |

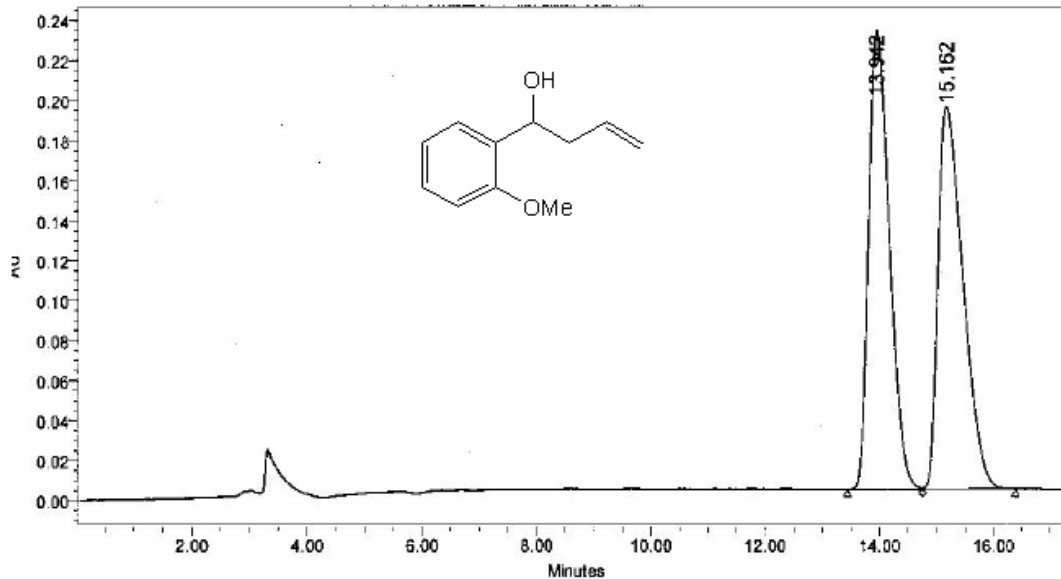

|   | RT (min) | Area (μV*sec) | % Area | Height (μV) | % Height |
|---|----------|---------------|--------|-------------|----------|
| 1 | 13.942   | 5792592       | 49.93  | 229749      | 54.60    |
| 2 | 15.162   | 5808656       | 50.07  | 191025      | 45.40    |

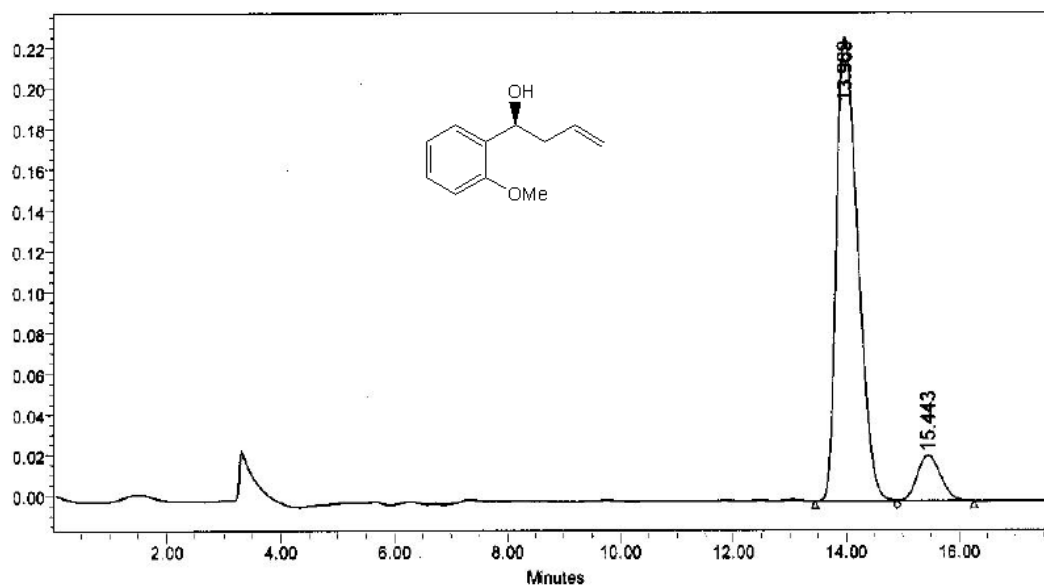

|   | RT (min) | Area (μV*sec) | % Area | Height (μV) | % Height |
|---|----------|---------------|--------|-------------|----------|
| 1 | 13.969   | 6003890       | 90.43  | 228347      | 91.11    |
| 2 | 15.443   | 635470        | 9.57   | 22294       | 8.89     |

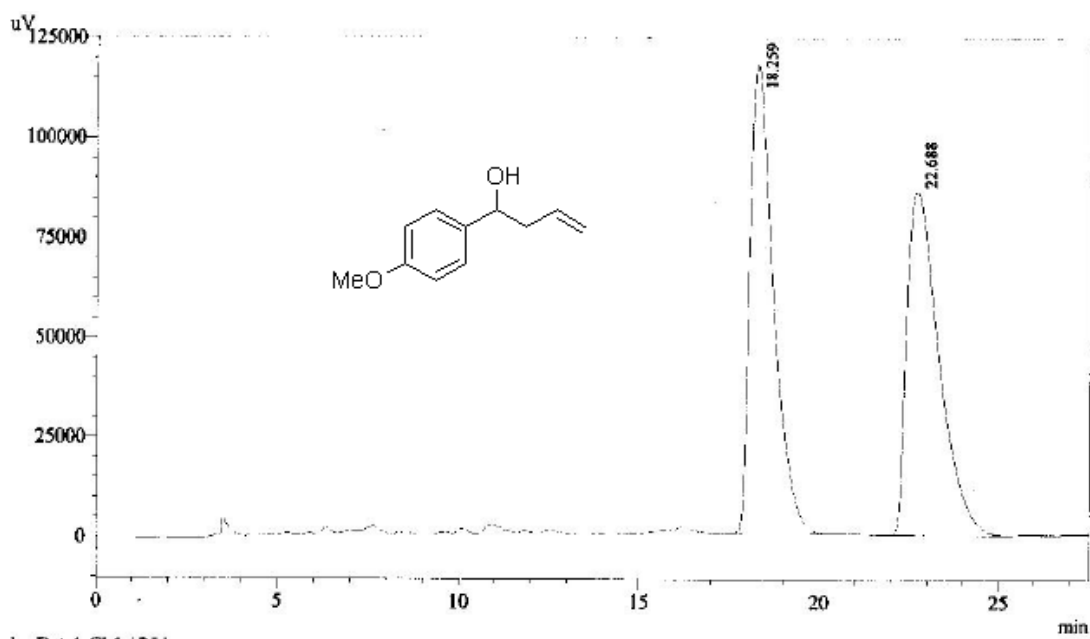

1 Det.A Ch1 / 254nm

Detector A Ch1 254nm

| Peak# | Ret. Time | Area     | Height | Area %  | Height % |
|-------|-----------|----------|--------|---------|----------|
| 1     | 18.259    | 5314079  | 117233 | 49.779  | 57.691   |
| 2     | 22.688    | 5361321  | 85977  | 50.221  | 42.309   |
| Total |           | 10675399 | 203210 | 100.000 | 100.000  |

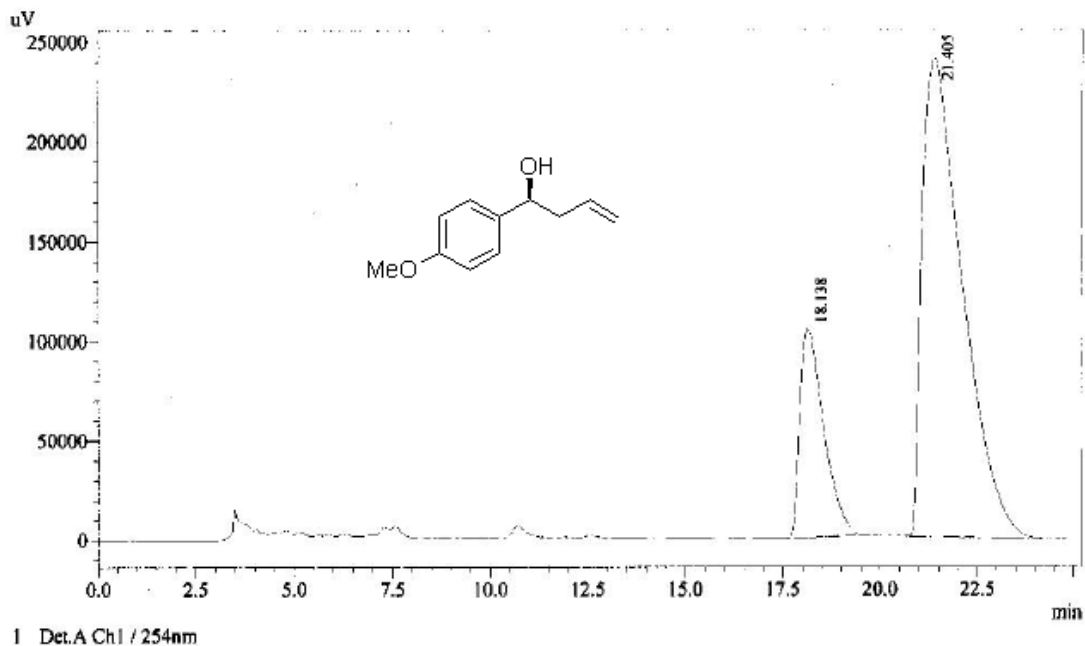

| Peak#        | Ret. Time | Area            | Height        | Area %         | Height %       |
|--------------|-----------|-----------------|---------------|----------------|----------------|
| 1            | 18.138    | 4502072         | 105761        | 20.465         | 30.501         |
| 2            | 21.405    | 17496331        | 240989        | 79.535         | 69.499         |
| <b>Total</b> |           | <b>21998403</b> | <b>346750</b> | <b>100.000</b> | <b>100.000</b> |

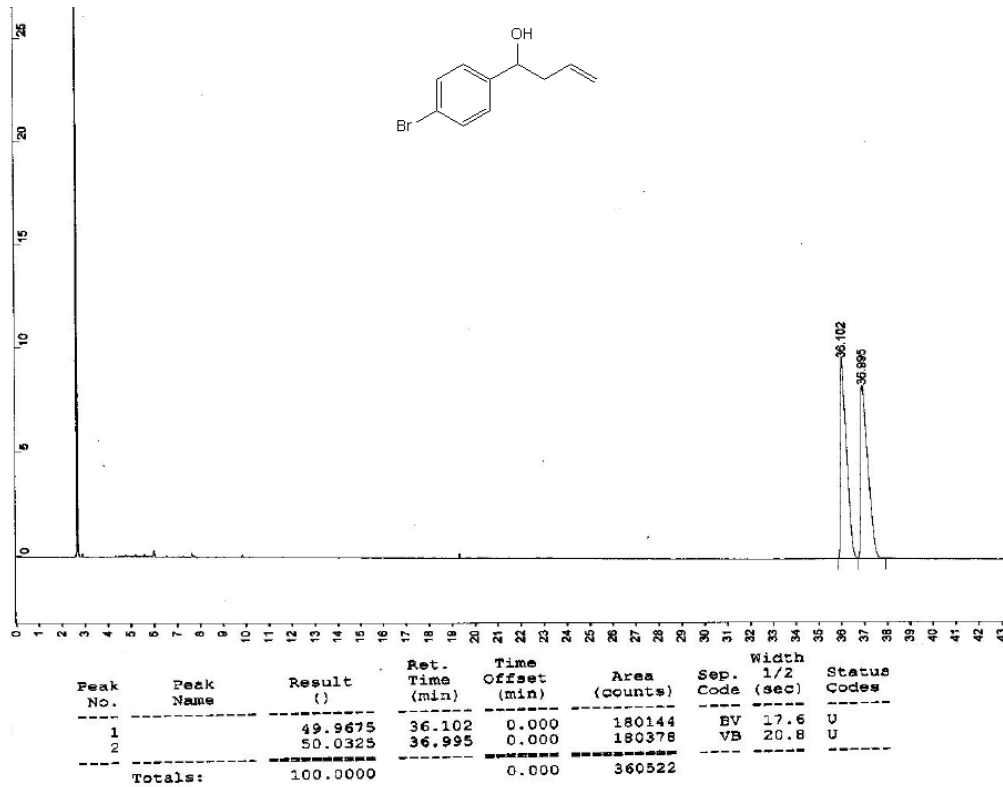

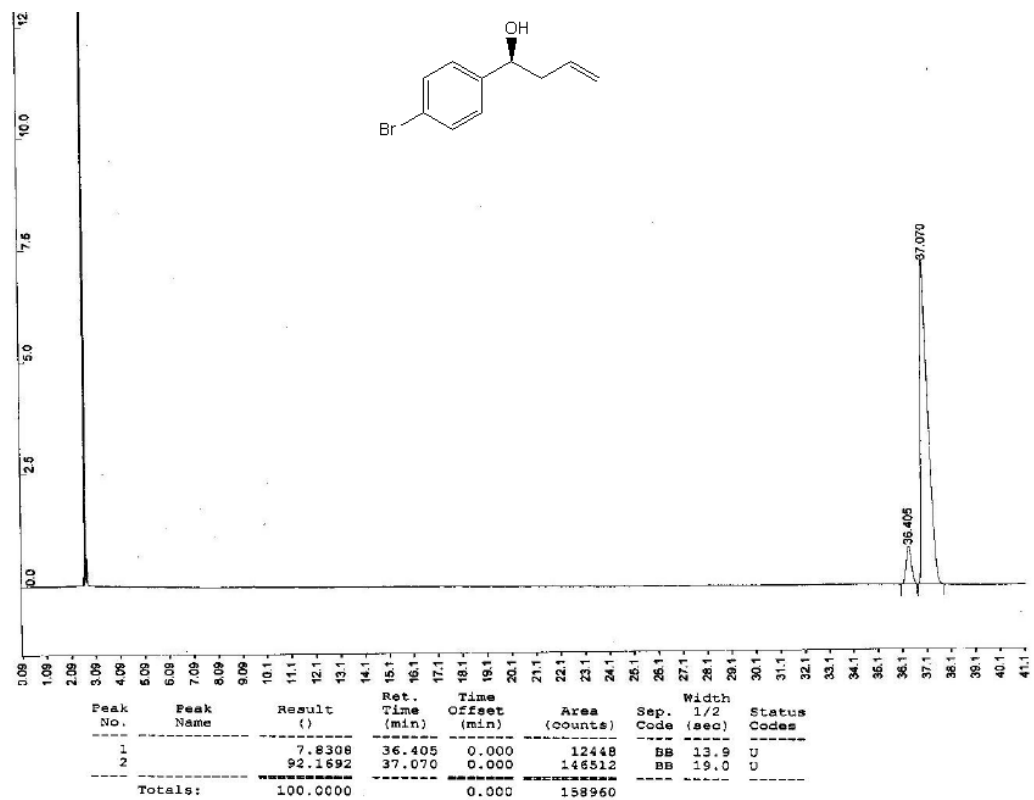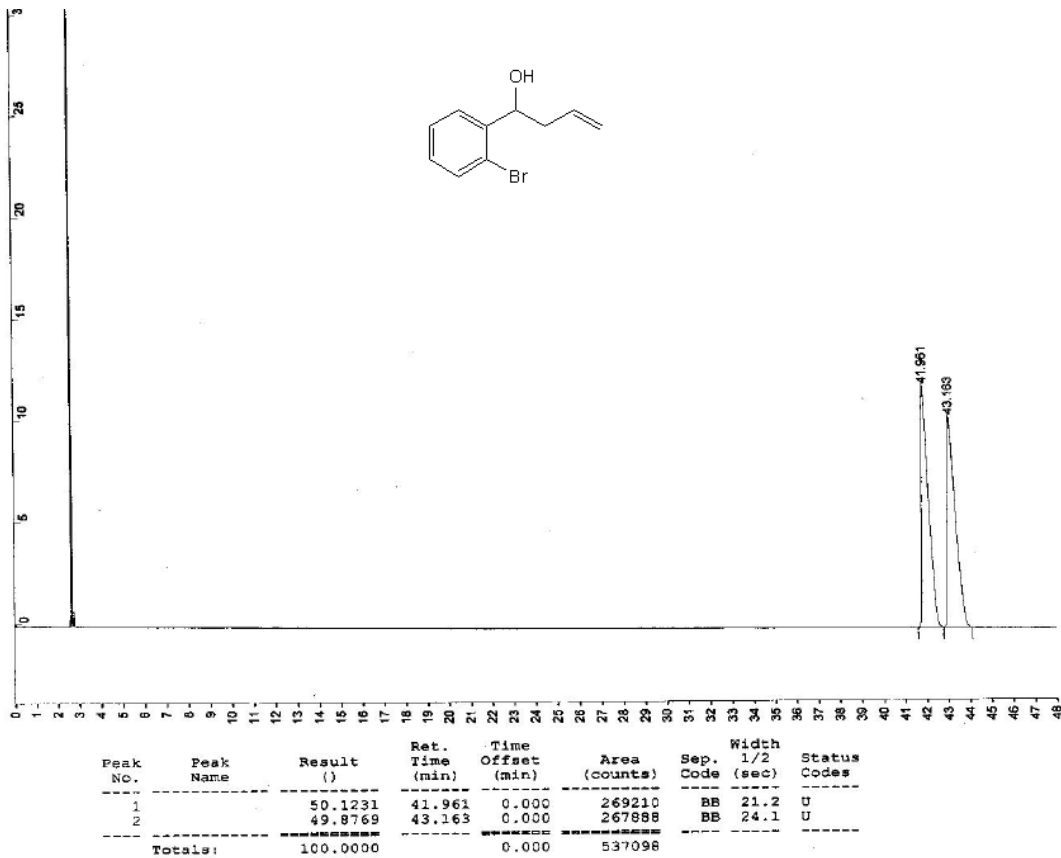

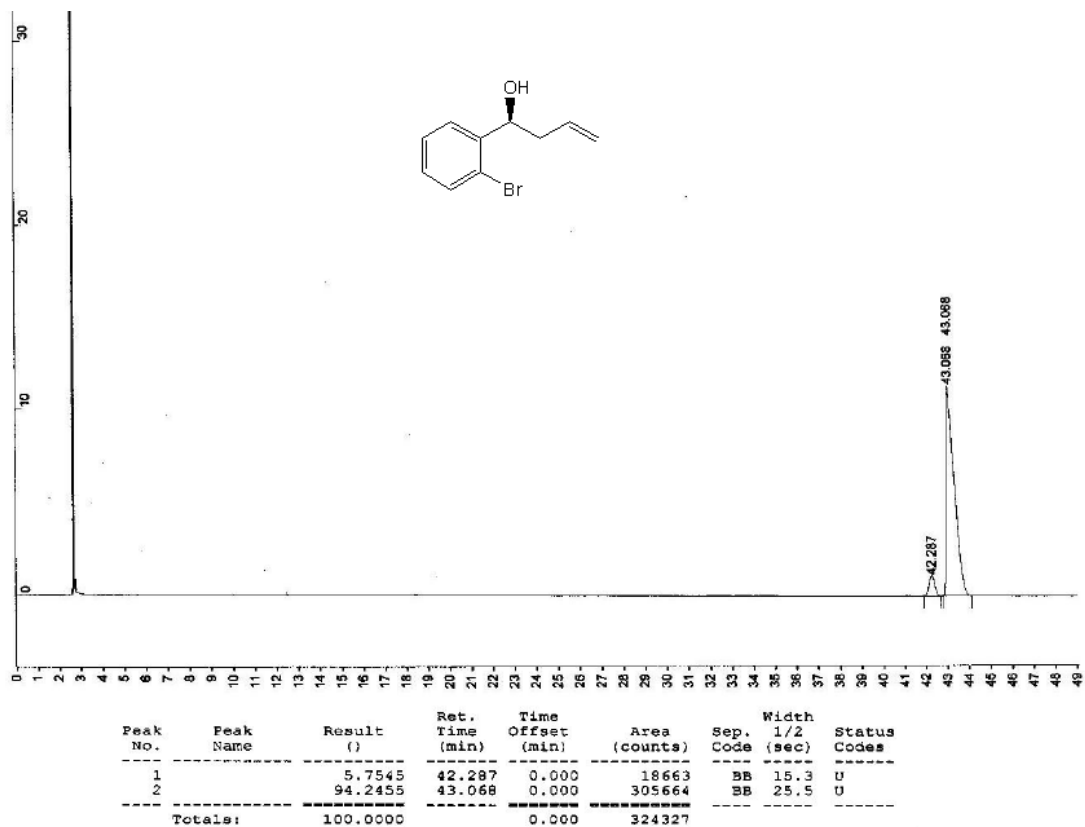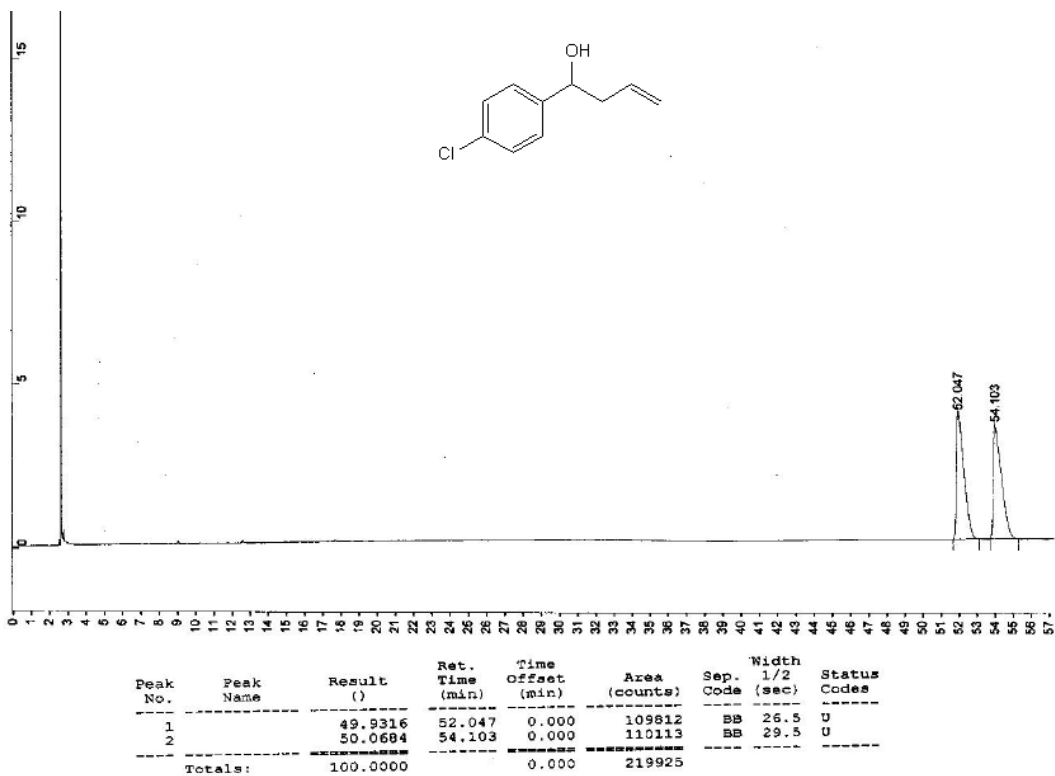



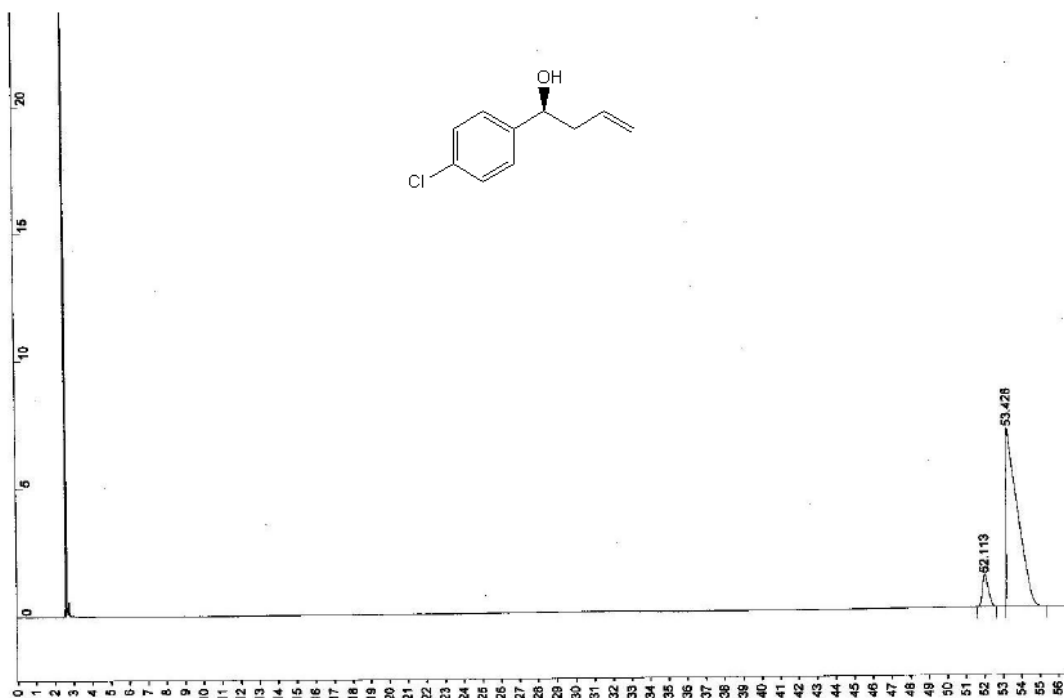

| Peak No. | Peak Name | Result (°) | Ret. Time (min) | Time Offset (min) | Area (counts) | Sep. Code | Width 1/2 (sec) | Status Codes |
|----------|-----------|------------|-----------------|-------------------|---------------|-----------|-----------------|--------------|
| 1        |           | 8.5800     | 52.113          | 0.000             | 27990         | BB        | 20.5            | U            |
| 2        |           | 91.4200    | 53.426          | 0.000             | 298238        | BB        | 40.9            | U            |
| Totals:  |           | 100.0000   |                 | 0.000             | 326228        |           |                 |              |

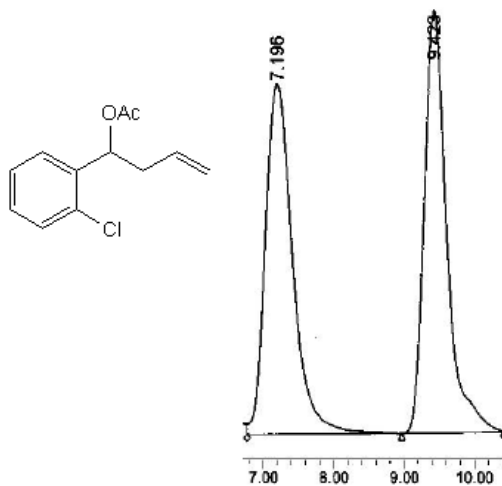

| RT (min) | Area (μV*sec) | % Area | Height (μV) | % Height |
|----------|---------------|--------|-------------|----------|
| 1 7.196  | 3488397       | 50.12  | 130023      | 45.27    |
| 2 9.423  | 3471874       | 49.88  | 157196      | 54.73    |

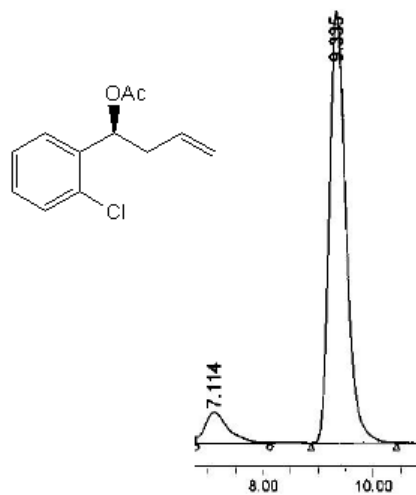

|   | RT<br>(min) | Area<br>( $\mu\text{V}\cdot\text{sec}$ ) | % Area | Height<br>( $\mu\text{V}$ ) | %<br>Height |
|---|-------------|------------------------------------------|--------|-----------------------------|-------------|
| 1 | 7.114       | 384546                                   | 9.37   | 12993                       | 6.81        |
| 2 | 9.335       | 3721363                                  | 90.63  | 177762                      | 93.19       |

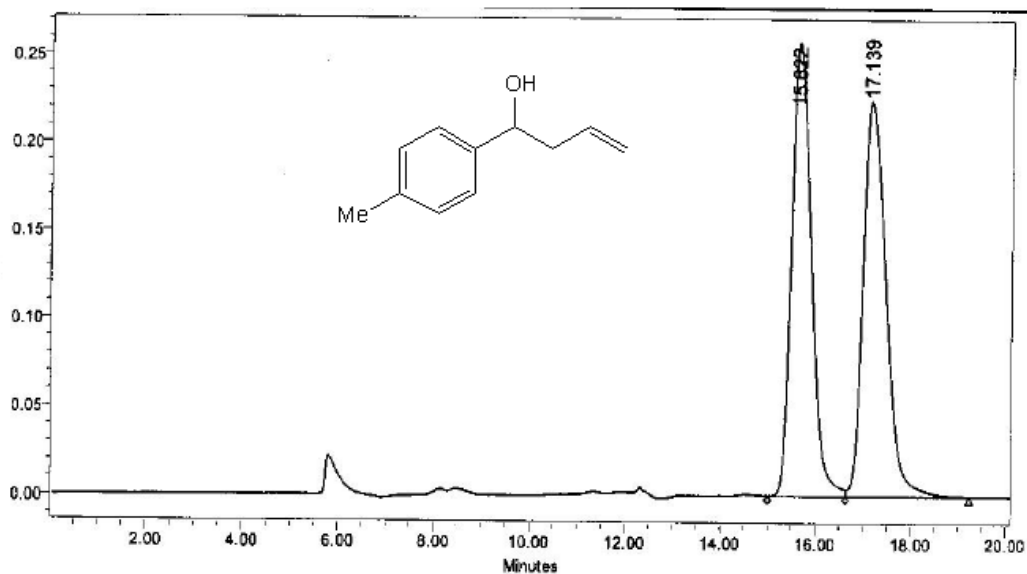

|   | RT (min) | Area ( $\mu\text{V}\cdot\text{sec}$ ) | % Area | Height ( $\mu\text{V}$ ) | % Height |
|---|----------|---------------------------------------|--------|--------------------------|----------|
| 1 | 15.622   | 7362450                               | 49.78  | 257692                   | 53.47    |
| 2 | 17.139   | 7446322                               | 50.22  | 224270                   | 46.53    |

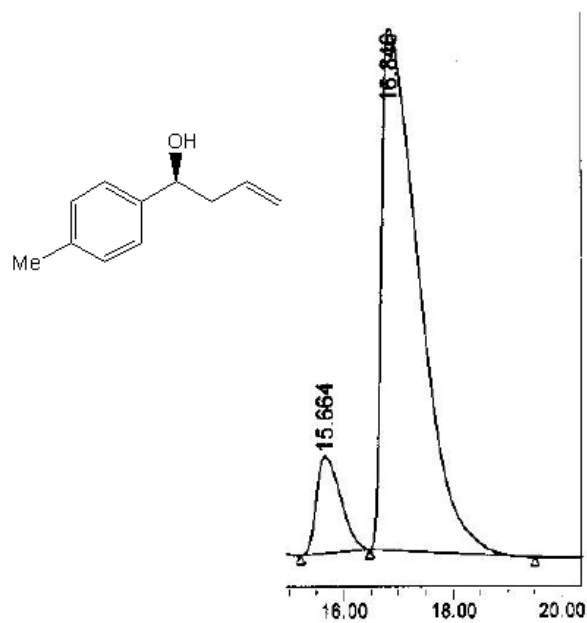

|   | RT (min) | Area ( $\mu\text{V}\cdot\text{sec}$ ) | % Area | Height ( $\mu\text{V}$ ) | % Height |
|---|----------|---------------------------------------|--------|--------------------------|----------|
| 1 | 15.664   | 4196280                               | 10.67  | 137381                   | 15.58    |
| 2 | 16.846   | 35145704                              | 89.33  | 744285                   | 84.42    |

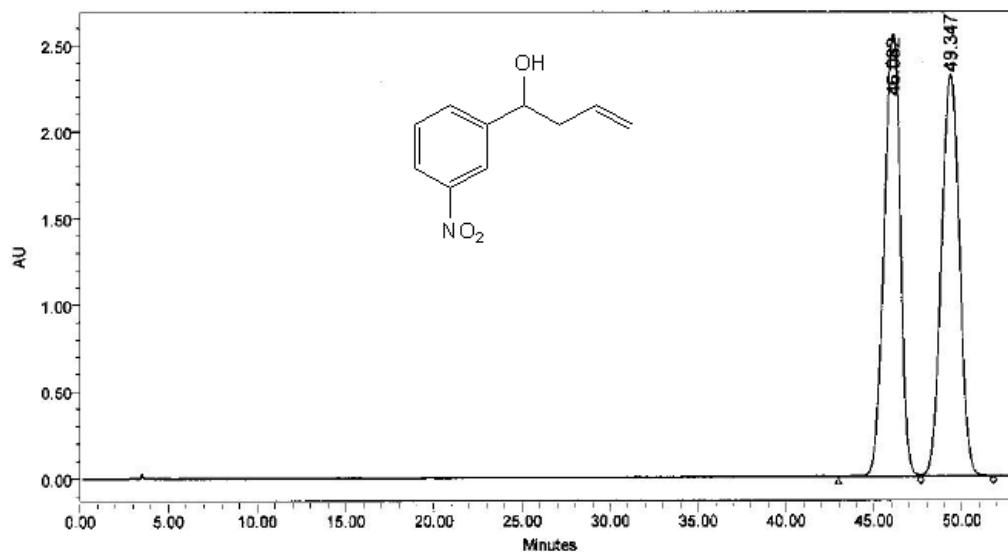

| RT (min) | Area ( $\mu\text{V}\cdot\text{sec}$ ) | % Area | Height ( $\mu\text{V}$ ) | % Height |
|----------|---------------------------------------|--------|--------------------------|----------|
| 1 46.082 | 163643877                             | 49.74  | 2552228                  | 52.48    |
| 2 49.347 | 165324881                             | 50.26  | 2311237                  | 47.52    |

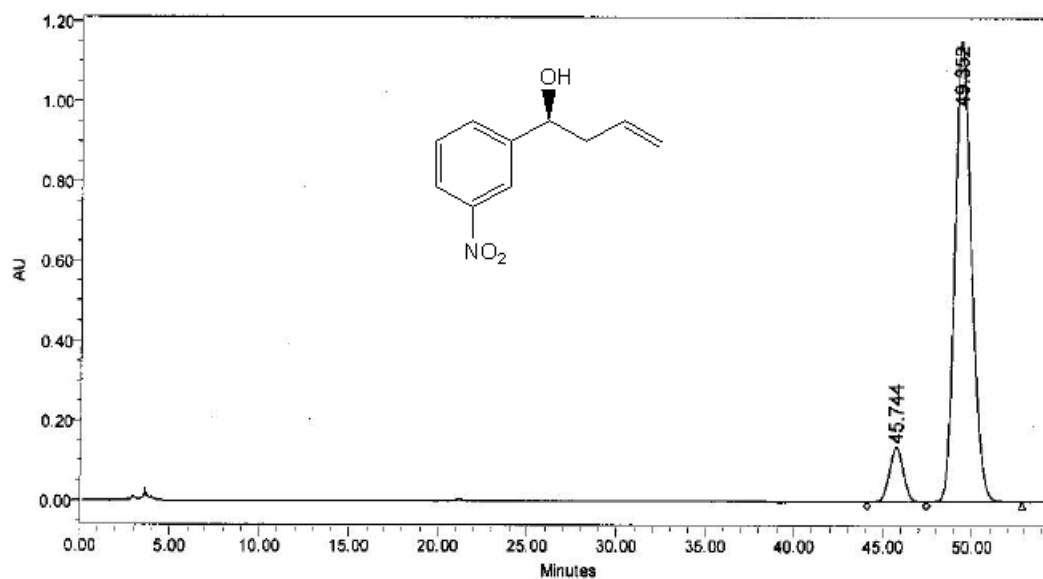

| RT (min) | Area ( $\mu\text{V}\cdot\text{sec}$ ) | % Area | Height ( $\mu\text{V}$ ) | % Height |
|----------|---------------------------------------|--------|--------------------------|----------|
| 1 45.744 | 7567399                               | 9.14   | 137403                   | 10.64    |
| 2 49.352 | 75283192                              | 90.86  | 1153588                  | 89.36    |

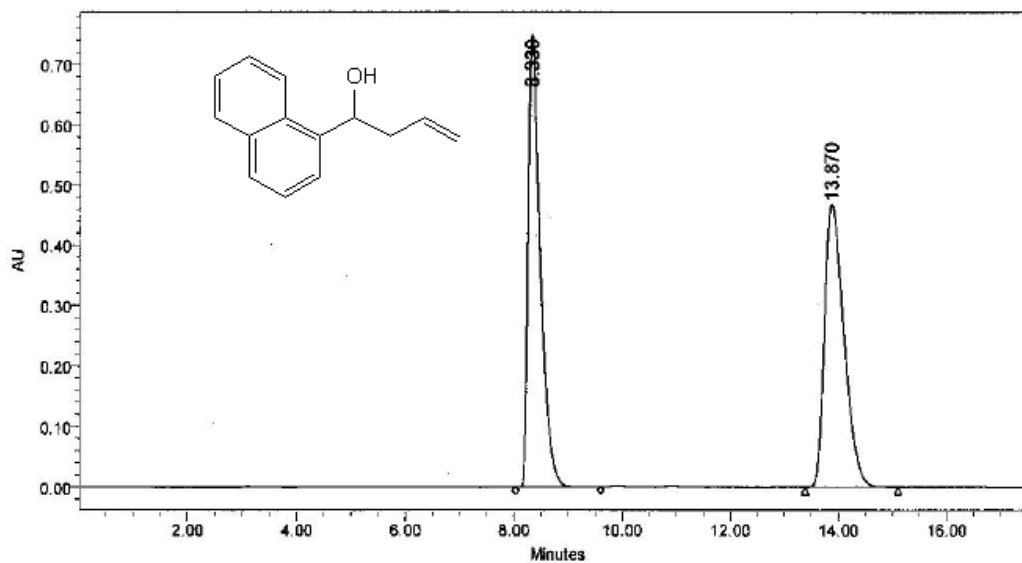

|   | RT (min) | Area ( $\mu\text{V}\cdot\text{sec}$ ) | % Area | Height ( $\mu\text{V}$ ) | % Height |
|---|----------|---------------------------------------|--------|--------------------------|----------|
| 1 | 8.330    | 11698479                              | 50.00  | 749686                   | 61.56    |
| 2 | 13.870   | 11698625                              | 50.00  | 468067                   | 38.44    |

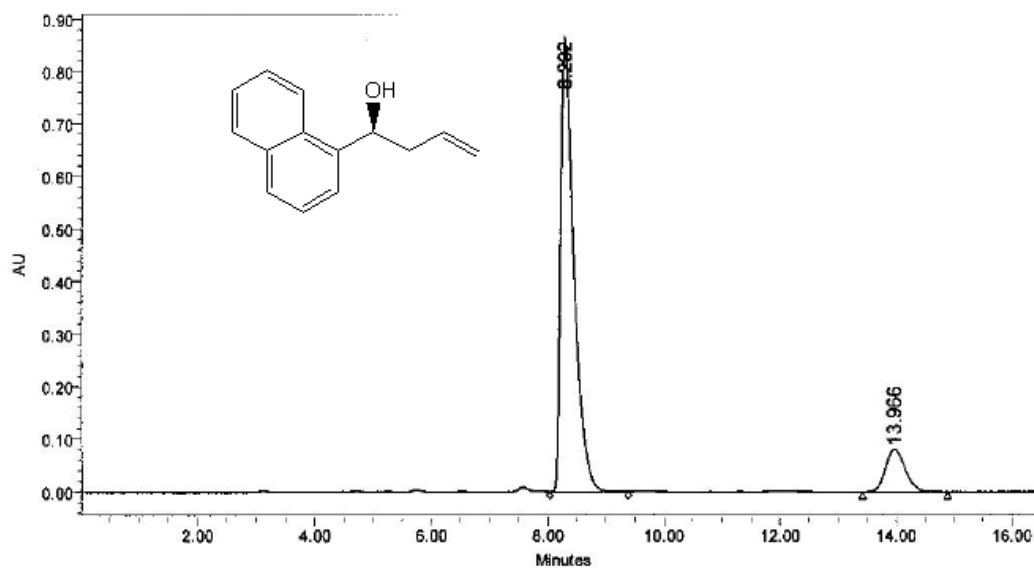

|   | RT (min) | Area ( $\mu\text{V}\cdot\text{sec}$ ) | % Area | Height ( $\mu\text{V}$ ) | % Height |
|---|----------|---------------------------------------|--------|--------------------------|----------|
| 1 | 8.292    | 13645550                              | 88.11  | 870397                   | 91.60    |
| 2 | 13.966   | 1840549                               | 11.89  | 79810                    | 8.40     |

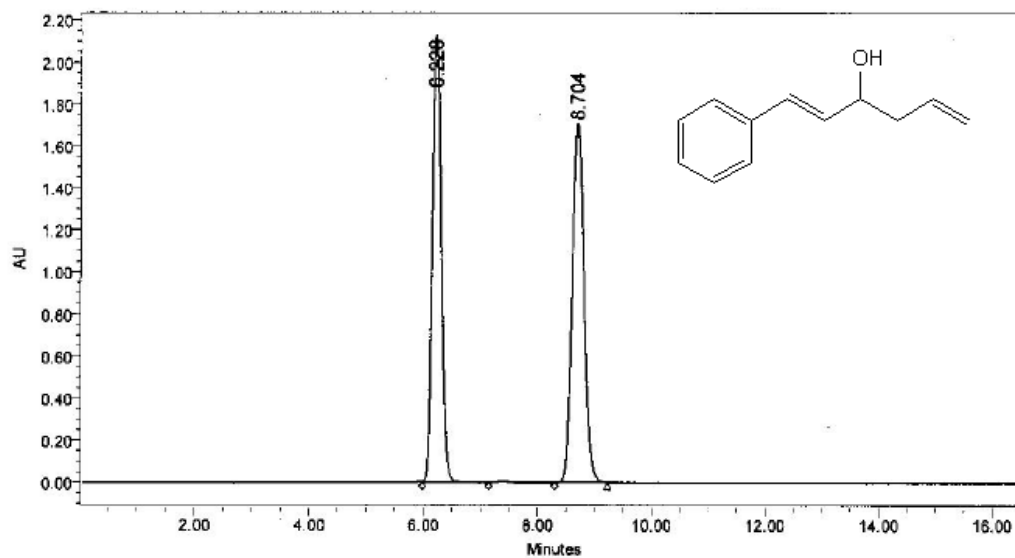

|   | RT (min) | Area ( $\mu\text{V}\cdot\text{sec}$ ) | % Area | Height ( $\mu\text{V}$ ) | % Height |
|---|----------|---------------------------------------|--------|--------------------------|----------|
| 1 | 6.228    | 23424960                              | 48.70  | 2134865                  | 55.51    |
| 2 | 8.704    | 24671964                              | 51.30  | 1710869                  | 44.49    |

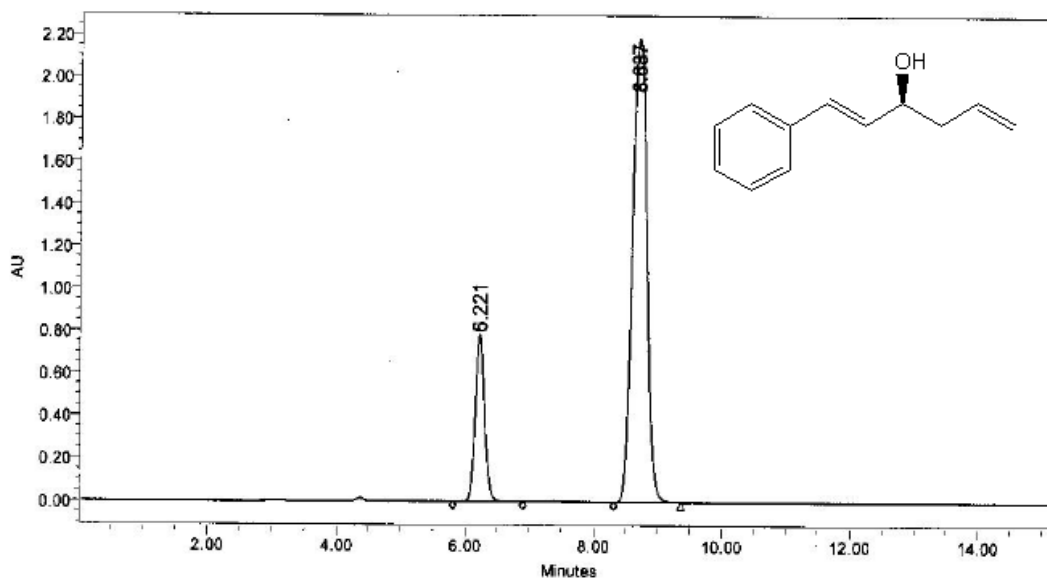

|   | RT (min) | Area ( $\mu\text{V}\cdot\text{sec}$ ) | % Area | Height ( $\mu\text{V}$ ) | % Height |
|---|----------|---------------------------------------|--------|--------------------------|----------|
| 1 | 6.221    | 7821006                               | 18.72  | 782885                   | 26.37    |
| 2 | 8.687    | 33947847                              | 81.28  | 2185823                  | 73.63    |

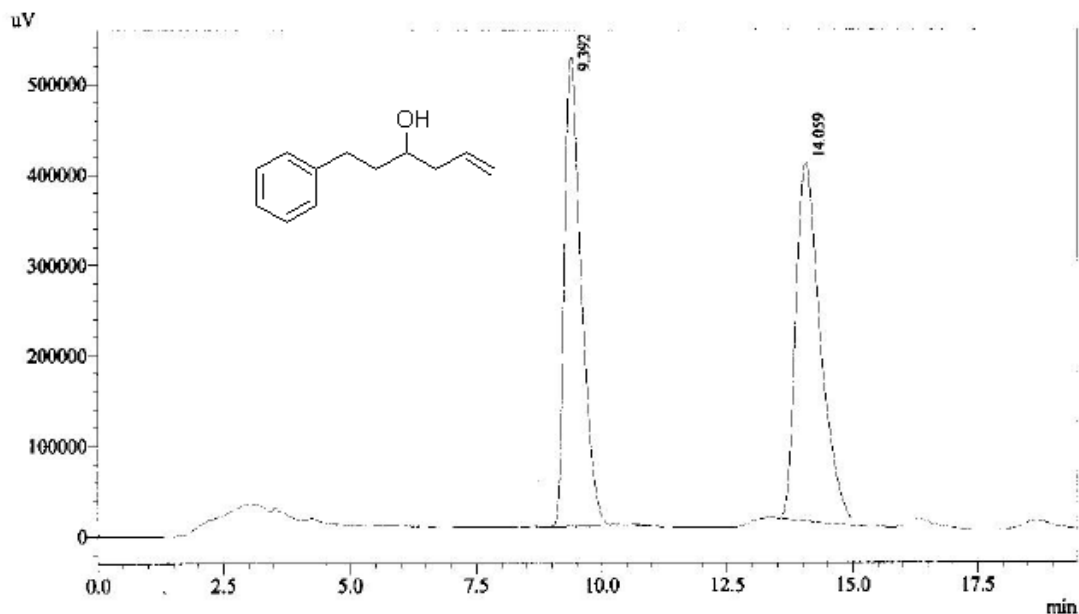

1 Det.A Ch1 / 220nm

Detector A Ch1 220nm

| Peak# | Ret. Time | Area     | Height | Area %  | Height % |
|-------|-----------|----------|--------|---------|----------|
| 1     | 9.392     | 12303203 | 519344 | 47.637  | 56.719   |
| 2     | 14.059    | 13523735 | 396297 | 52.363  | 43.281   |
| Total |           | 25826937 | 915641 | 100.000 | 100.000  |

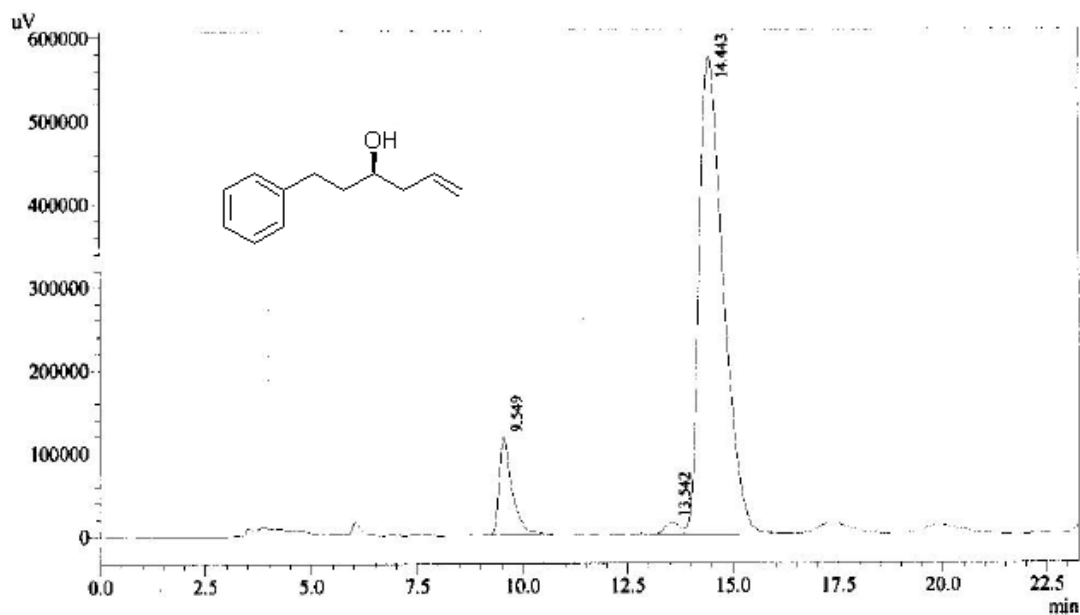

1 Det.A Ch1 / 220nm

Detector A Ch1 220nm

| Peak# | Ret. Time | Area     | Height | Area %  | Height % |
|-------|-----------|----------|--------|---------|----------|
| 1     | 9.549     | 2544613  | 118420 | 9.869   | 16.727   |
| 2     | 13.542    | 369291   | 15133  | 1.432   | 2.138    |
| 3     | 14.443    | 22868953 | 574403 | 88.698  | 81.135   |
| Total |           | 25782857 | 707957 | 100.000 | 100.000  |
